# Supplementary material
Source: PubMed Central journal article supplement (PMC5452028)
Supplement: EMBJ-36-1559-s001.pdf [file EMBJ-36-1559-s001.pdf]

## Table of content

Appendix Figure S1. Overlap between different nitrogen-starvation transcriptome datasets.

Appendix Figure S2. Nitrogen starvation and other stresses halt *P. tricornutum* growth and cell cycle progression.

Appendix Figure S3. Nitrogen starvation and other stresses differentially affect lipid and carbohydrate accumulation in *P. tricornutum* cells.

Appendix Figure S4. Effects of dark incubation on the *P. tricornutum* transcriptome.

Appendix Figure S5. Effects of nocodazole on the *P. tricornutum* transcriptome.

Appendix Figure S6. Effects of phosphorus starvation on the *P. tricornutum* transcriptome.

Appendix Figure S7. The phosphate stress cluster.

Appendix Figure S8. Comparison of the *Phatr2* and *Phatr3* gene models for *bZIP14*.

Appendix Figure S9. Metabolite profiling of *bZIP14* overexpression lines.

Appendix Figure S10. bZIP14 does not bind the CACGTG motif.

Appendix Figure S11. Molecular phylogenetic analysis by the maximum likelihood method.

Appendix Figure S12. Expression analysis of *bZIP14* genes in *P. tricornutum*, *T. pseudonana* and *F. cylindrus* following nutrient starvation.

Appendix Table S1. *P. tricornutum* gene promoters containing the predicted bZIP14 DNA-binding motifs.

Appendix Table S2. Parameters used for peak annotation in the GC-MS analysis.

Appendix Table S3. Primers used for cloning and qRT-PCR analysis.

Appendix References

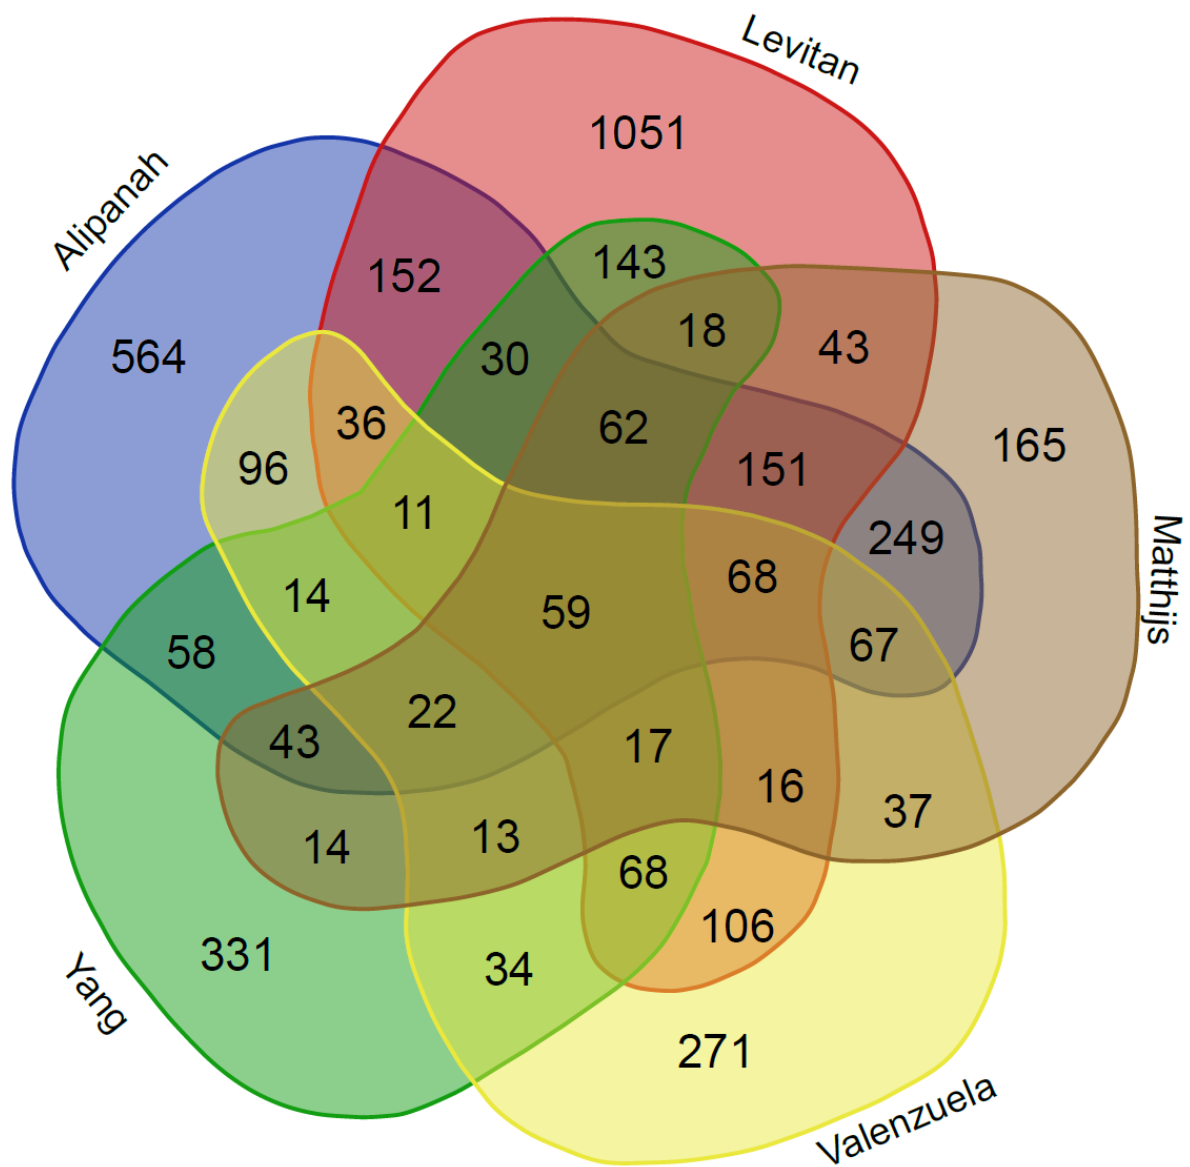

**Appendix Figure S1. Overlap between different nitrogen-starvation transcriptome datasets.** A cut-off value of 1 log<sub>2</sub> fold upregulation relative to the relevant control in each study was used. Names refer to the respective published studies: Levitan *et al* (2015), Valenzuela *et al* (2012), Yang *et al* (2013), Alipanah *et al* (2015), and Matthijs *et al* (2016).

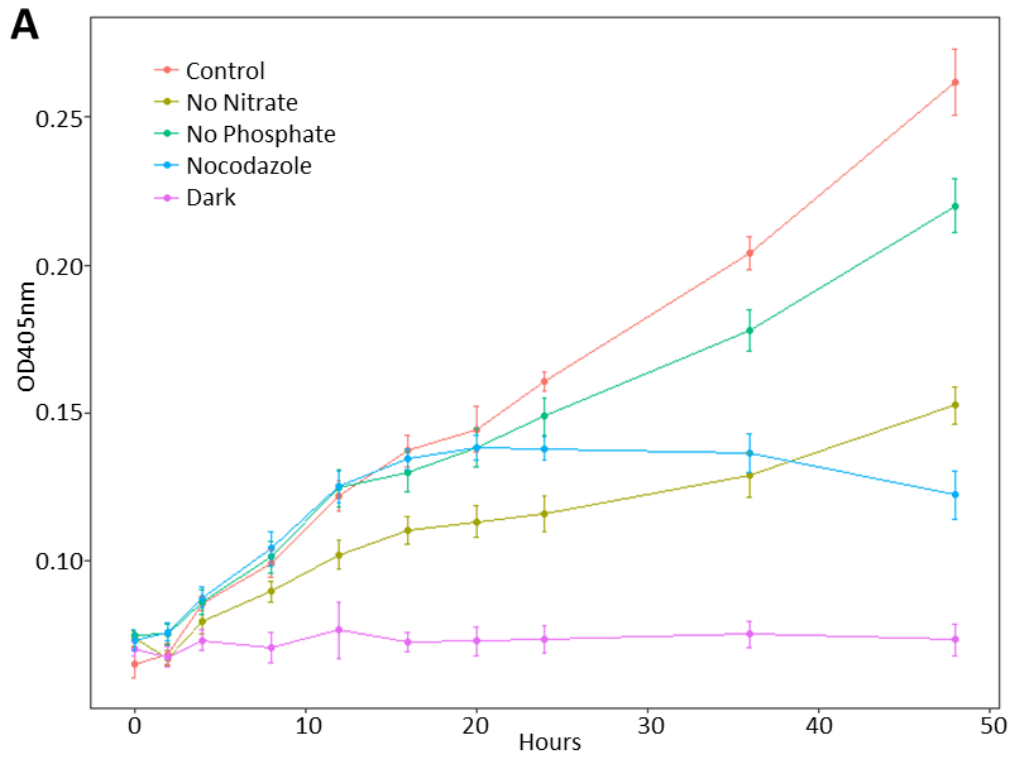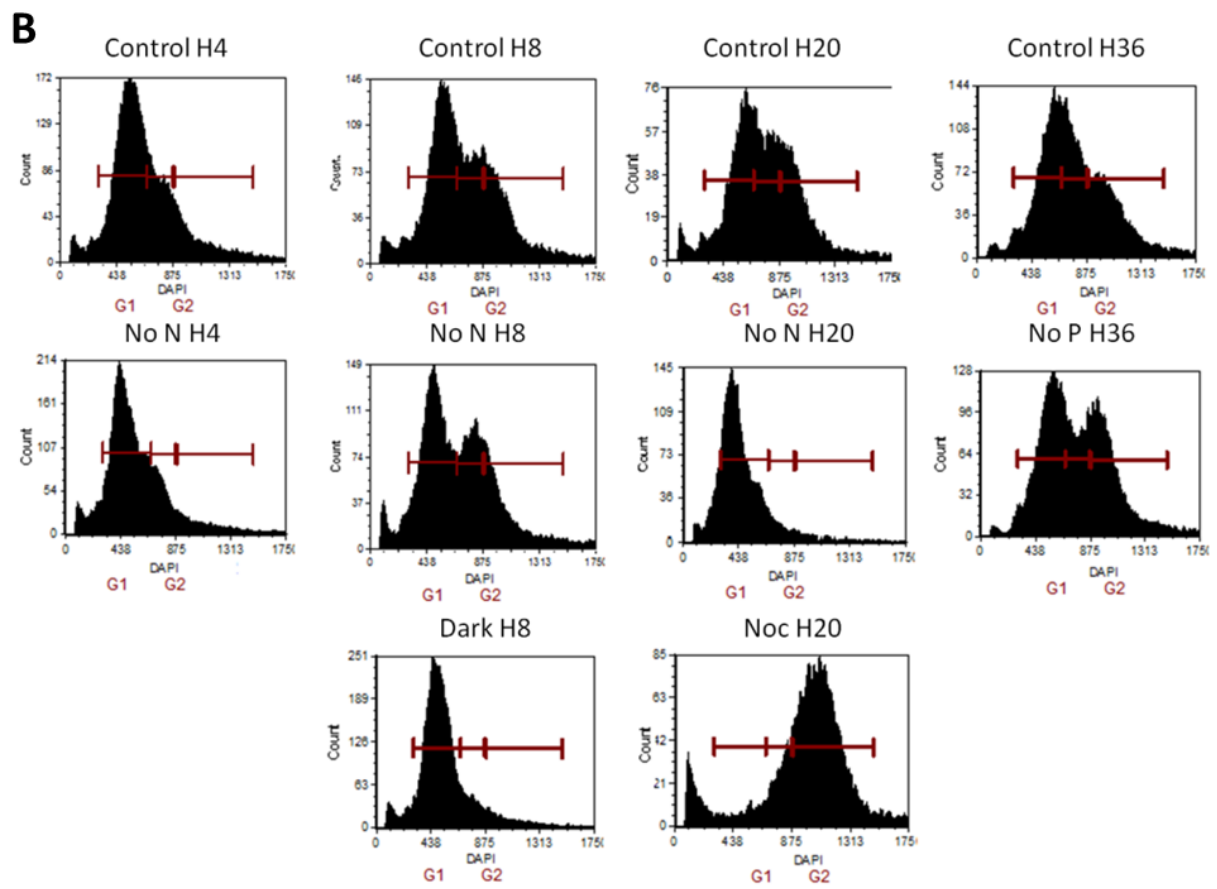

**Appendix Figure S2. Nitrogen starvation and other stresses halt *P. tricornutum* growth and cell cycle progression.**

- A Relative growth profiles. Growth was measured by OD<sub>405</sub> (*y*-axis) to show the general trend of growth (*n*=3). The *x*-axis indicates time in hours. Error bars represent the standard deviation.
- B Flow cytometry on DAPI-stained nuclei. Representative flow histogrammes of the samples harvested for RNA-Seq (*n*=3). 2C and 4C DNA contents correspond with G1 and G2, respectively. The *y*-axis represents the cell counts. The gradual progression from exponential growth towards cell cycle arrest is visible for all treated samples after 8 h (H8), i.e. for nitrogen-starved (No N), dark-incubated (Dark), and nocodazole-treated (Noc) cells, but not for phosphate starved (No P) cells. Nitrogen-starved cells still underwent approximately one more division, but halted their cell cycle at the G1/S transition as illustrated by a decreasing peak at 4C and an increasingly sharp peak at 2C. The cells incubated in the dark showed no increase in culture density (OD), although the flow histogrammes revealed progression of the G2/M phase to G1/S arrest. This apparent contradiction is the consequence of measuring cells by OD only, because it has been shown that cells dividing in the dark have a smaller volume (Chauton *et al*, 2013). The toxic effect of nocodazole was increasingly visible from 20 h onwards, with cells no longer surviving after 48 h, which corresponded to the flow histogrammes, because almost the entire population was in G2/M arrest. The effects of phosphate starvation were very mild compared with the other experimental treatments; however this was anticipated, because the amount of phosphate required for diatom growth is 1/16 of that of nitrogen, as determined by the classic Redfield ratio and cells often contain substantial intracellular stores of this nutrient (Falkowski *et al*, 2004).

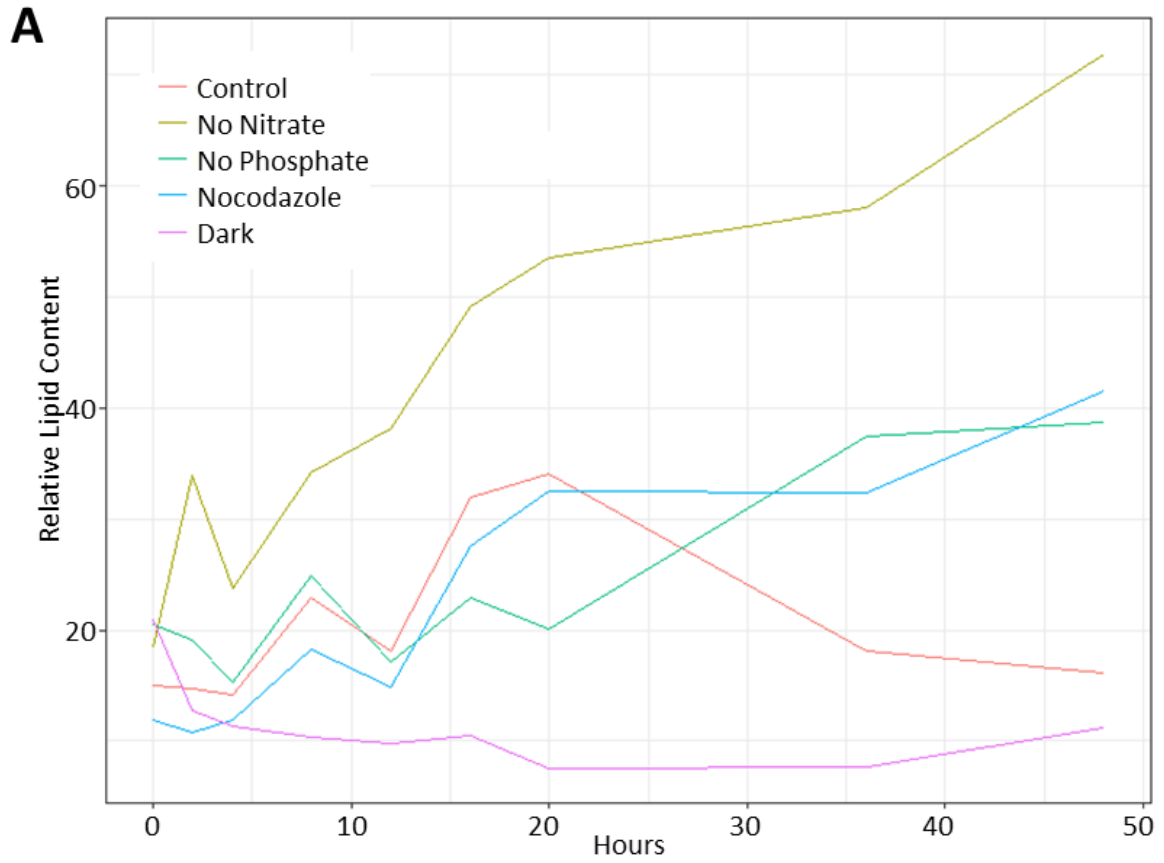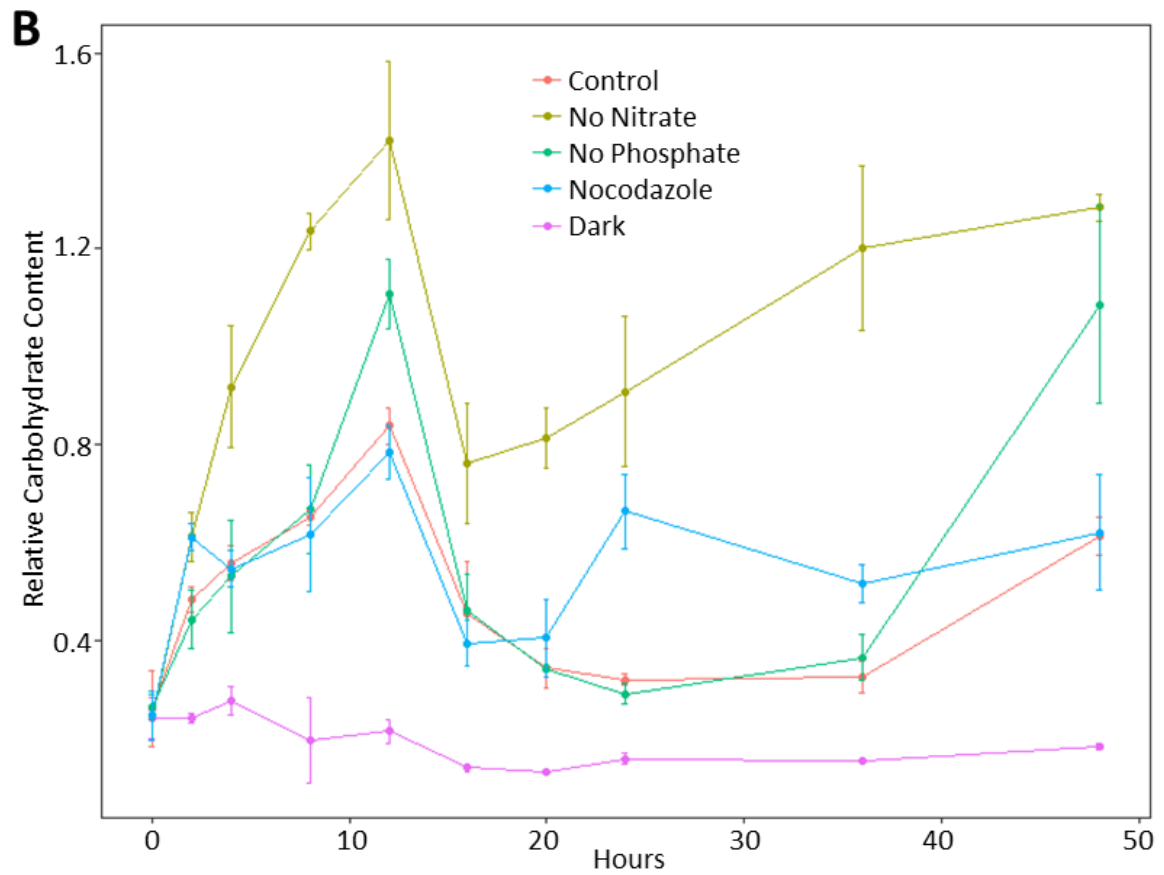

**Appendix Figure S3. Nitrogen starvation and other stresses differentially affect lipid and carbohydrate accumulation in *P. tricornutum* cells.**

- A** Lipid content per cell. The *y*-axis represents fatty acid peak area divided by the OD<sub>405</sub> to account for differences in cell density (n=1). The *x*-axis indicates time in hours. Although the accumulation of lipids in stationary cells during nitrogen starvation is well established, it was not known whether lipid levels would noticeably increase during the shorter time span of our experiments. An unexpected rapid onset of lipid accumulation was visible in nitrogen-deprived cells, already 2 h after medium change. Conversely, cells placed in darkness rapidly consumed the limited amount of lipids stored during the early time points. Phosphate starvation and nocodazole treatment did not profoundly alter the intracellular lipid content compared with the control samples within the first 20 h, and increased lipid accumulation was only apparent after 48 h.
- B** Soluble carbohydrate content per culture. The *y*-axis represents the measured OD<sub>495</sub> of phenol-sulphuric acid derivatized sugar extractions (n=3). Error bars represent the standard deviation. The *x*-axis indicates time in hours. The main storage carbohydrate in *P. tricornutum* is chrysolaminarin but the method used cannot discriminate between polysaccharides and monosaccharides. Carbohydrate levels in nocodazole-treated samples were similar to the control. In the three other conditions, carbohydrate and lipid accumulation occurred concurrently. Cells incubated in the dark rapidly consumed their available carbohydrate reserves. Phosphate-starved cells behaved very similarly to the control, but an increased carbohydrate accumulation relative to nutrient-replete cells could be observed after 48 h. In nitrogen-starved cells, carbohydrate levels increased simultaneously with the accumulation of lipids. Although this result differs from a previous profiling study (Valenzuela *et al*, 2012), it is in agreement with the finding that knocking out the committed step of polysaccharide biosynthesis increases lipid accumulation, suggesting a significant carbon flux increase towards carbohydrates under nitrogen-limiting conditions (Daboussi *et al*, 2014). Cells starved for nitrogen during 72 h were previously reported to have increased carbohydrate levels although several enzymes for chrysolaminarin degradation were upregulated (Alipanah *et al*, 2015).

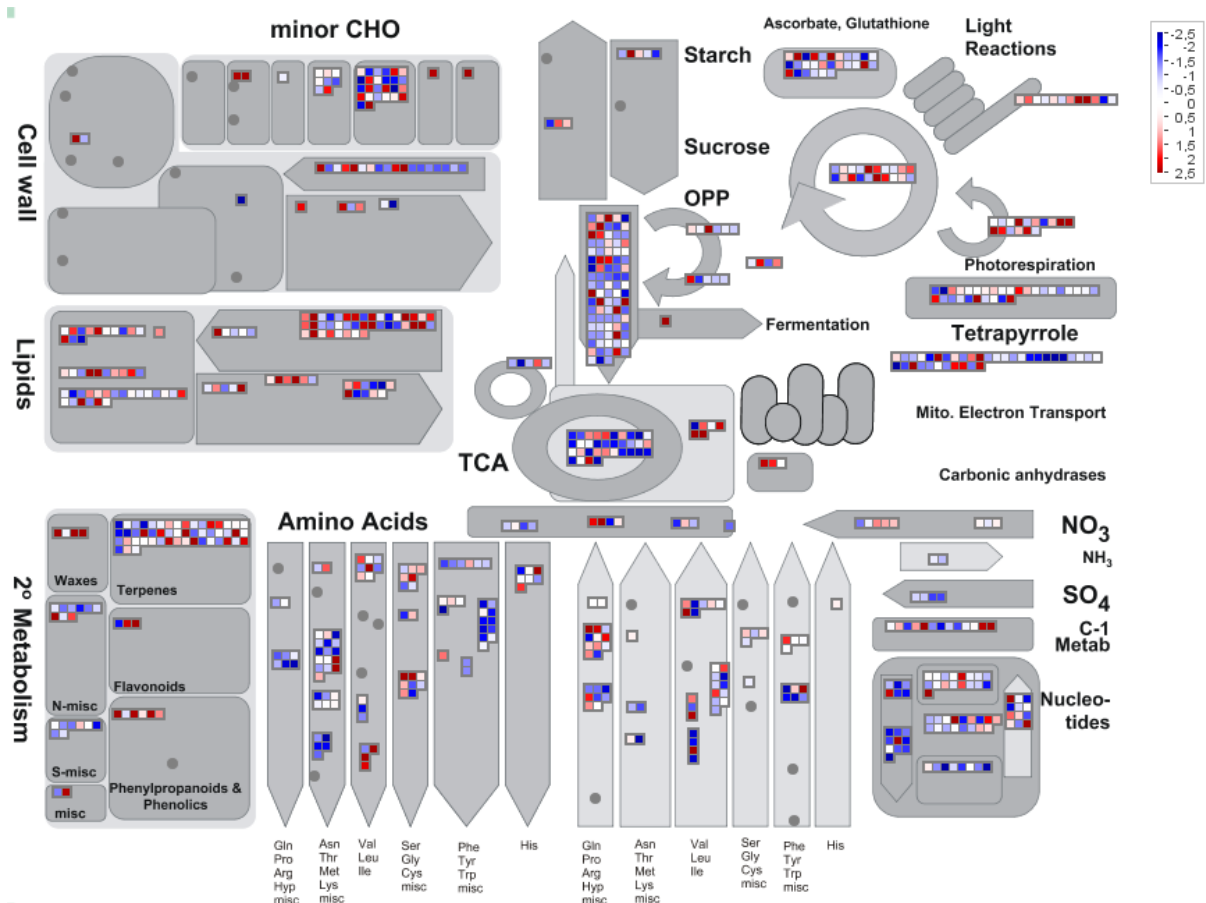

#### Appendix Figure S4. Effects of dark incubation on the *P. tricornutum* transcriptome.

Overview of reprogramming of primary metabolism as visualized by the MapMan programme and using the normalized RNA-Seq data. Points represent the  $\log_2$  fold change in gene expression versus control cells at the same time point during incubation in the dark for 8 h (n=3). Red and blue indicate gene induction and repression, respectively. It was our intention to halt lipid accumulation in diatom cells by depriving them of light, thus inhibiting photosynthesis. It should be noted, however, that sample harvesting included filtering, during which exposure of the dark-incubated cells to light for a few minutes was unavoidable. Consequently, these samples may better be considered as re-illuminated rather than strictly dark-incubated samples. A good indicator of this was the upregulation of *dsCyclin2*, a gene which has been reported to rapidly respond to light (Huysman *et al*, 2013), in the ‘dark’ samples. The light-dark shift resulted in a massive transcriptome change and was thereby the most disruptive treatment in our dataset. The number of up- and downregulated genes was 1,415 and 2,098, respectively (Dataset EV1). In total 120 TFs, over half of all predicted *P. tricornutum* TFs, displayed maximal expression in this sample. A myriad of cellular processes seemed to be affected, which, together with the upregulation of genes related to the photosynthetic machinery, chlorophyll biosynthesis and chloroplast control, points to a general response to light deprivation.

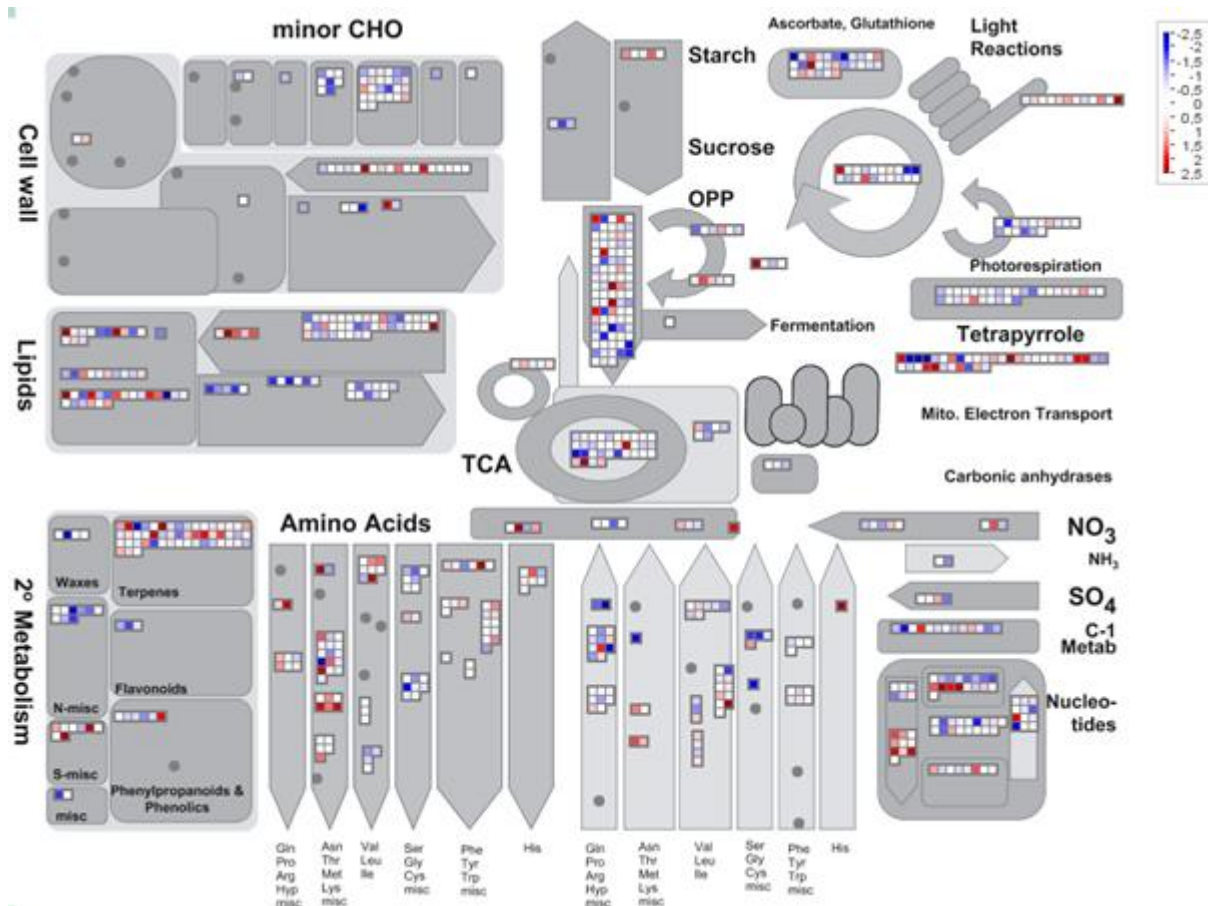

**Appendix Figure S5. Effects of nocodazole on the *P. tricornutum* transcriptome.** Overview of reprogramming of primary metabolism as visualized by the MapMan programme and using the normalized RNA-Seq data. Points represent the  $\log_2$  fold change in gene expression versus control cells at the same time point during a 20-h nocodazole treatment ( $n=3$ ). Red and blue indicate gene induction and repression, respectively. After 20 h of incubation with nocodazole, 965 and 398 genes were up- and downregulated (Dataset EV1), respectively. Although silicon transporters were amongst the most strongly induced genes, nutrient uptake was generally repressed. The most obvious effect of nocodazole treatment was a G2/M cell cycle arrest.



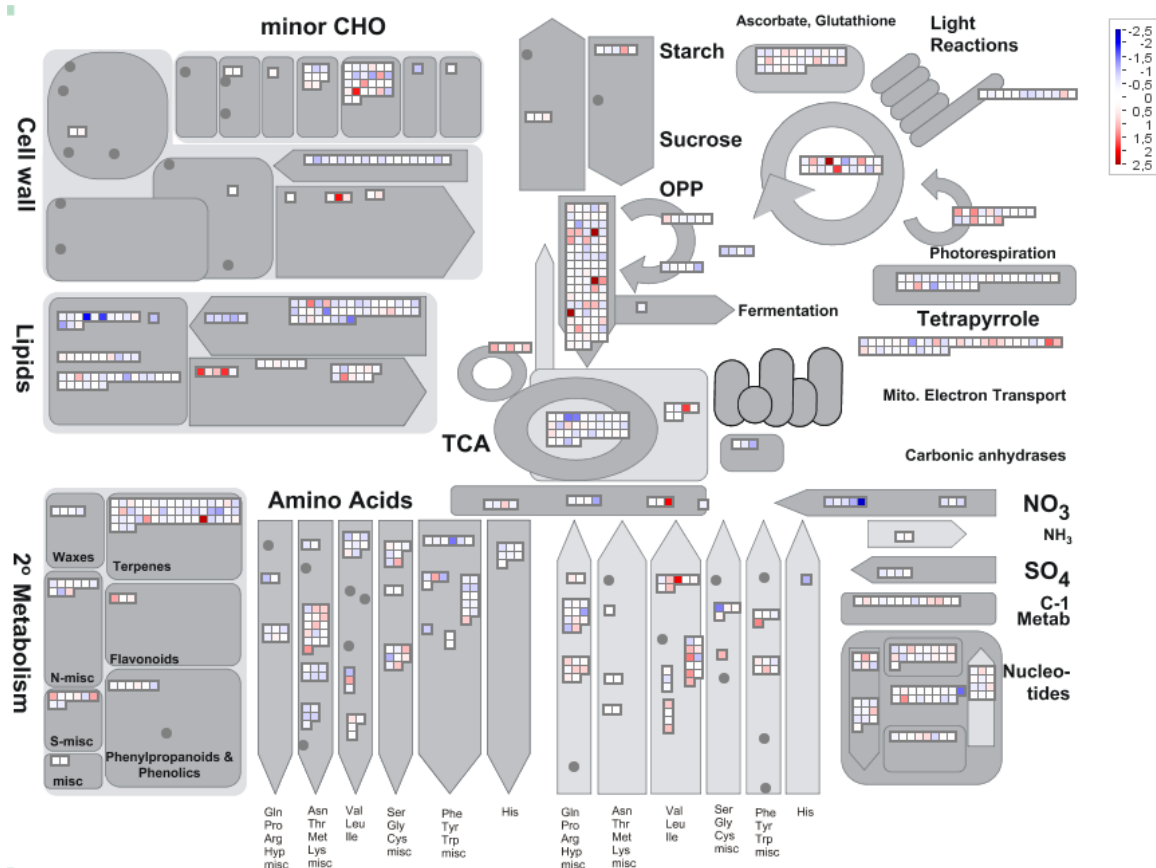

**Appendix Figure S6. Effects of phosphorus starvation on the *P. tricornutum* transcriptome.** Overview of reprogramming of primary metabolism as visualized by the MapMan programme and using the normalized RNA-Seq data. Points represent the log<sub>2</sub> fold change in gene expression versus control cells at the same time point during a 36-h phosphorus starvation (n=3). Red and blue indicate gene induction and repression, respectively. In agreement with its physiological effects, phosphate starvation had the mildest effects of all stresses as assessed at the transcriptomic level: only 681 genes showed markedly differential expression when compared with the control at 36 h. It seems likely that in our culturing conditions, the cells maintained a large internal pool of stored phosphate and that large-scale changes in cytosolic phosphate occurred only following the depletion of the vacuolar phosphate reserves. This assumption was supported by the observation that cells retained in phosphate-free medium halted growing after 72 h, whereas control samples maintained growth (data not shown). Nonetheless, a typical increase in the uptake capacity for this limiting nutrient and the use of alternative phosphorous sources was apparent in the transcriptome of the phosphate-starved cells, indicating the onset of a specific nutrient stress response in the 36-h sample. Genes encoding phosphate transporters and sodium/phosphate antiporters increased in expression and formed a co-expression cluster with genes coding for several nucleoside phosphatases (Appendix Figure S7), the latter being in close agreement with the role of nucleotides as a storage pool of phosphate. Several genes involved in the creatine cycle, such as creatine kinase and creatine transporters, were strongly downregulated. This pathway is able to rapidly regenerate ATP from ADP, transferring a phosphate group from phosphocreatine. Notably, several genes that were severely downregulated during phosphate starvation were highly upregulated during nitrogen starvation, including the aforementioned creatine transporters.

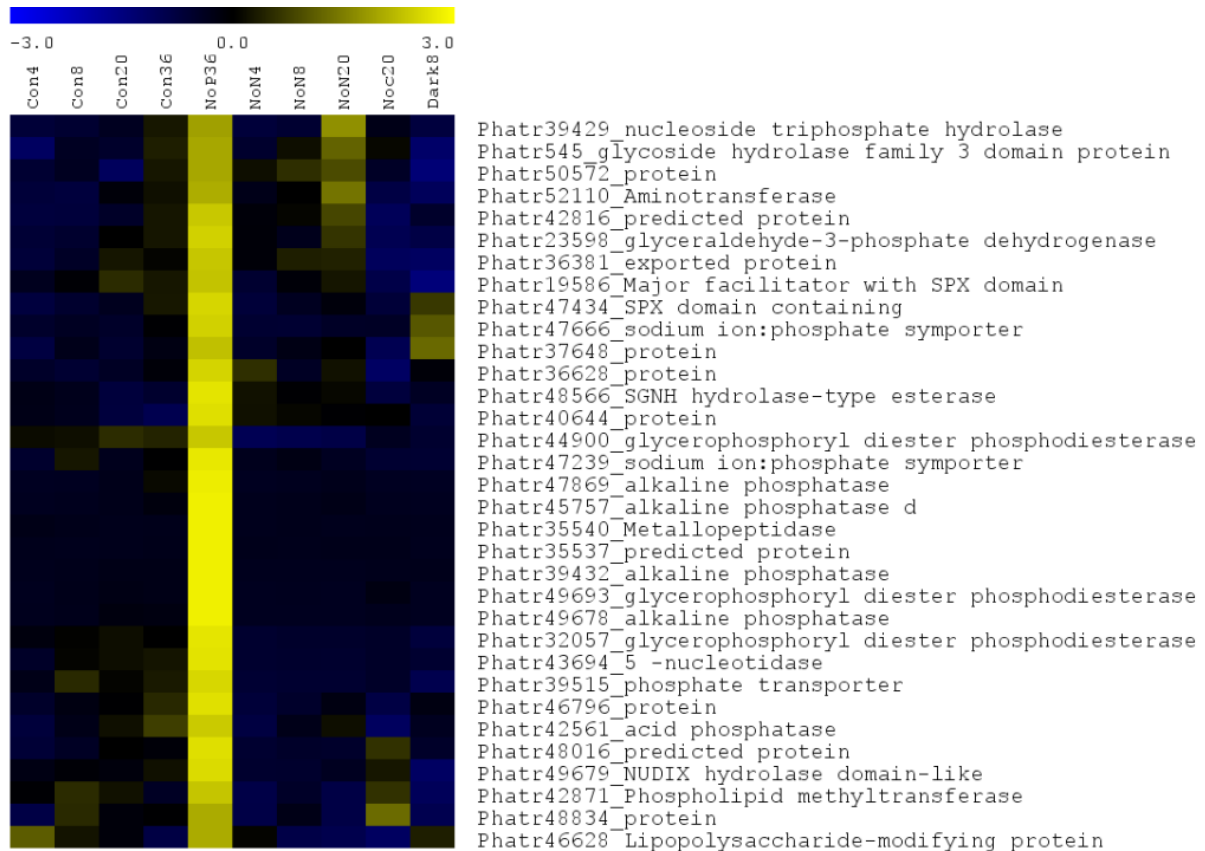

**Appendix Figure S7. The phosphate stress cluster.** Cluster analysis was performed based on FPKM values normalized to the average FPKM value across all samples. Yellow and blue indicate gene induction and repression, respectively.

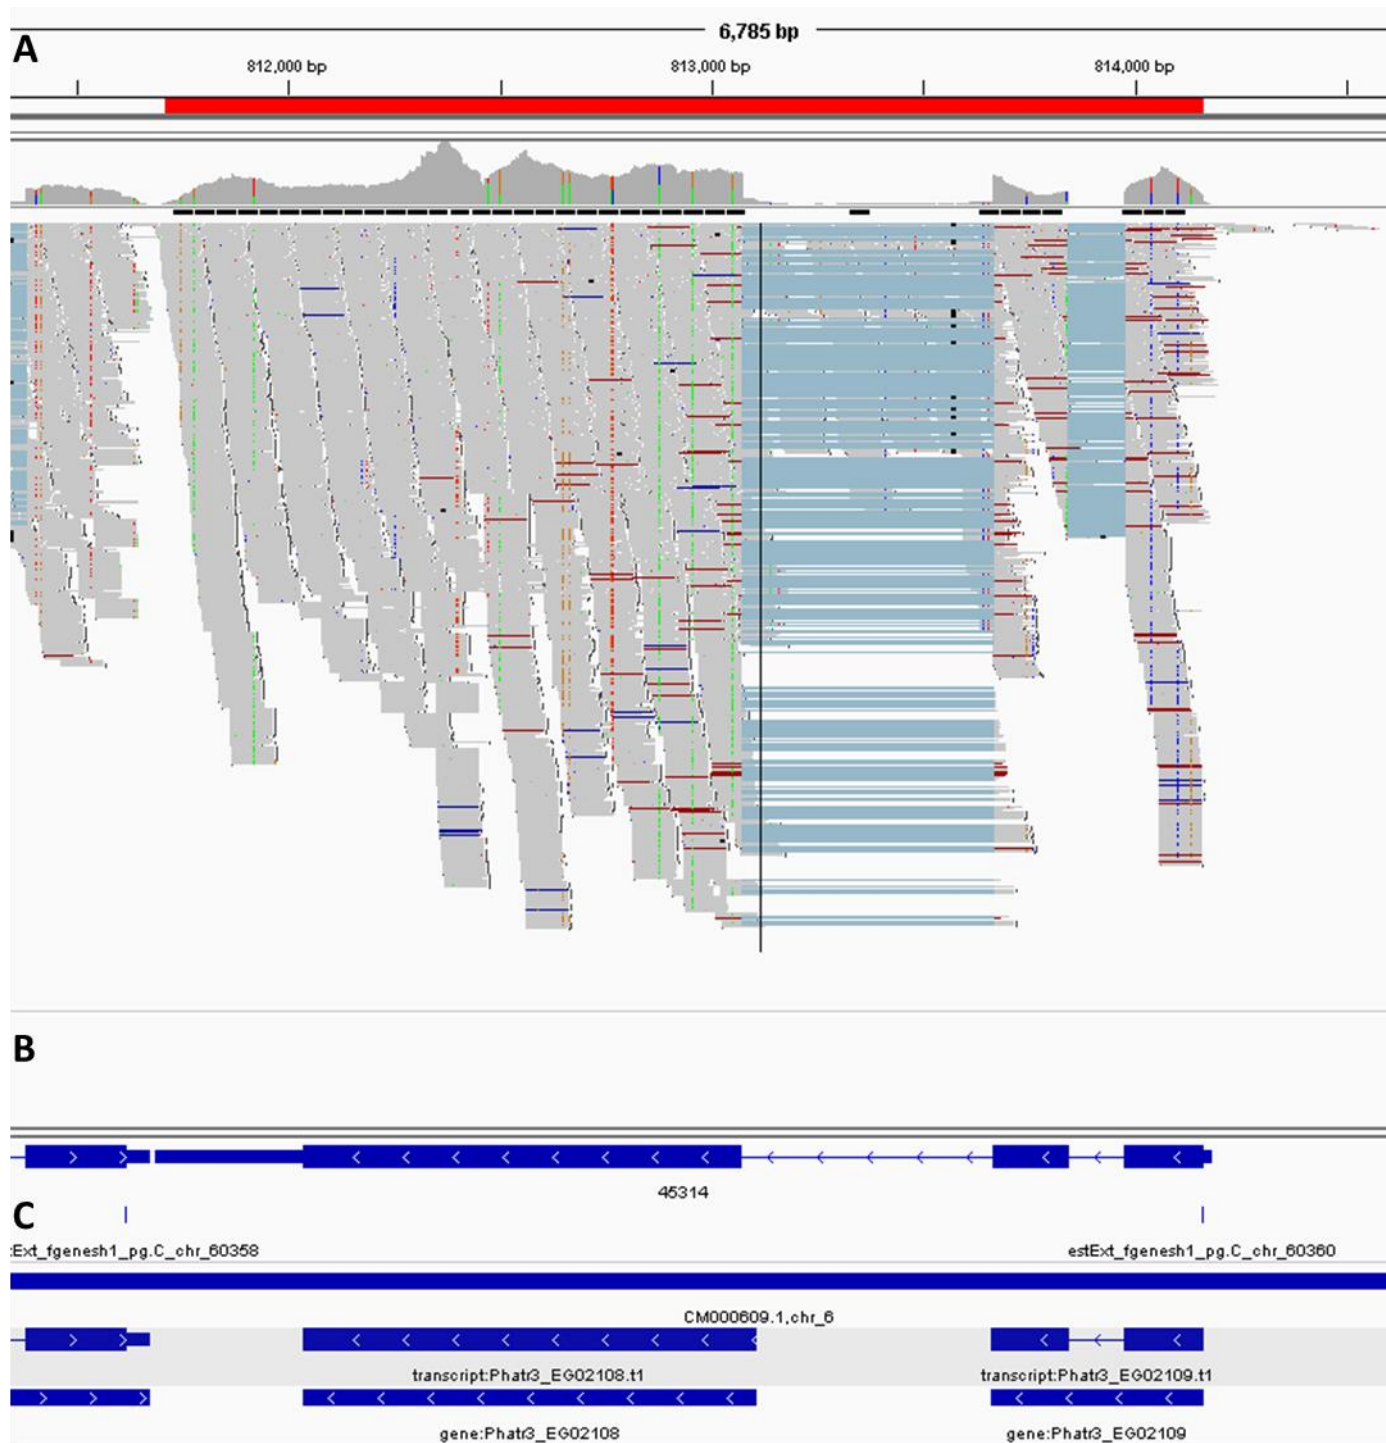

**Appendix Figure S8. Comparison of the *Phatr2* and *Phatr3* gene models for *bZIP14*.** Screenshot of the alignment of the RNA-Seq reads (A) from the control condition at 20 h with the gene models from the *Phatr2* annotation shown as 45314 (B) and the split gene model from *Phatr3* shown as EG02108 and EG02109 (C).

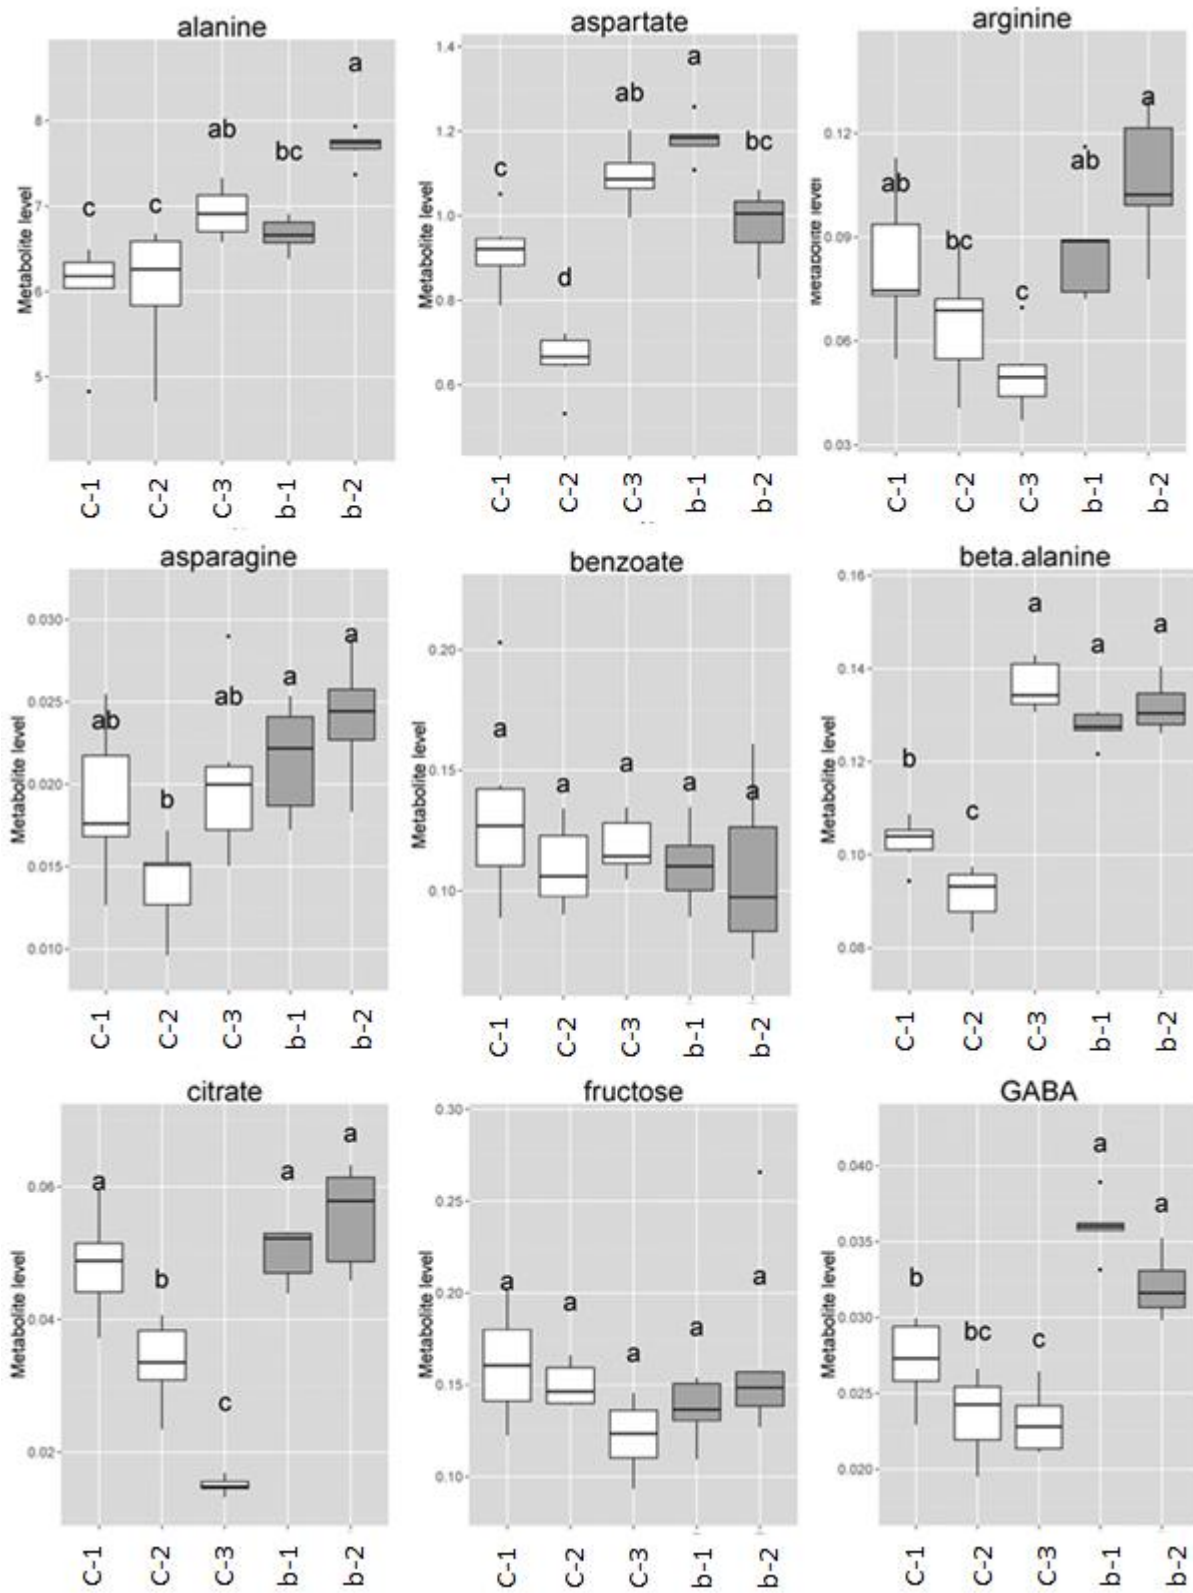

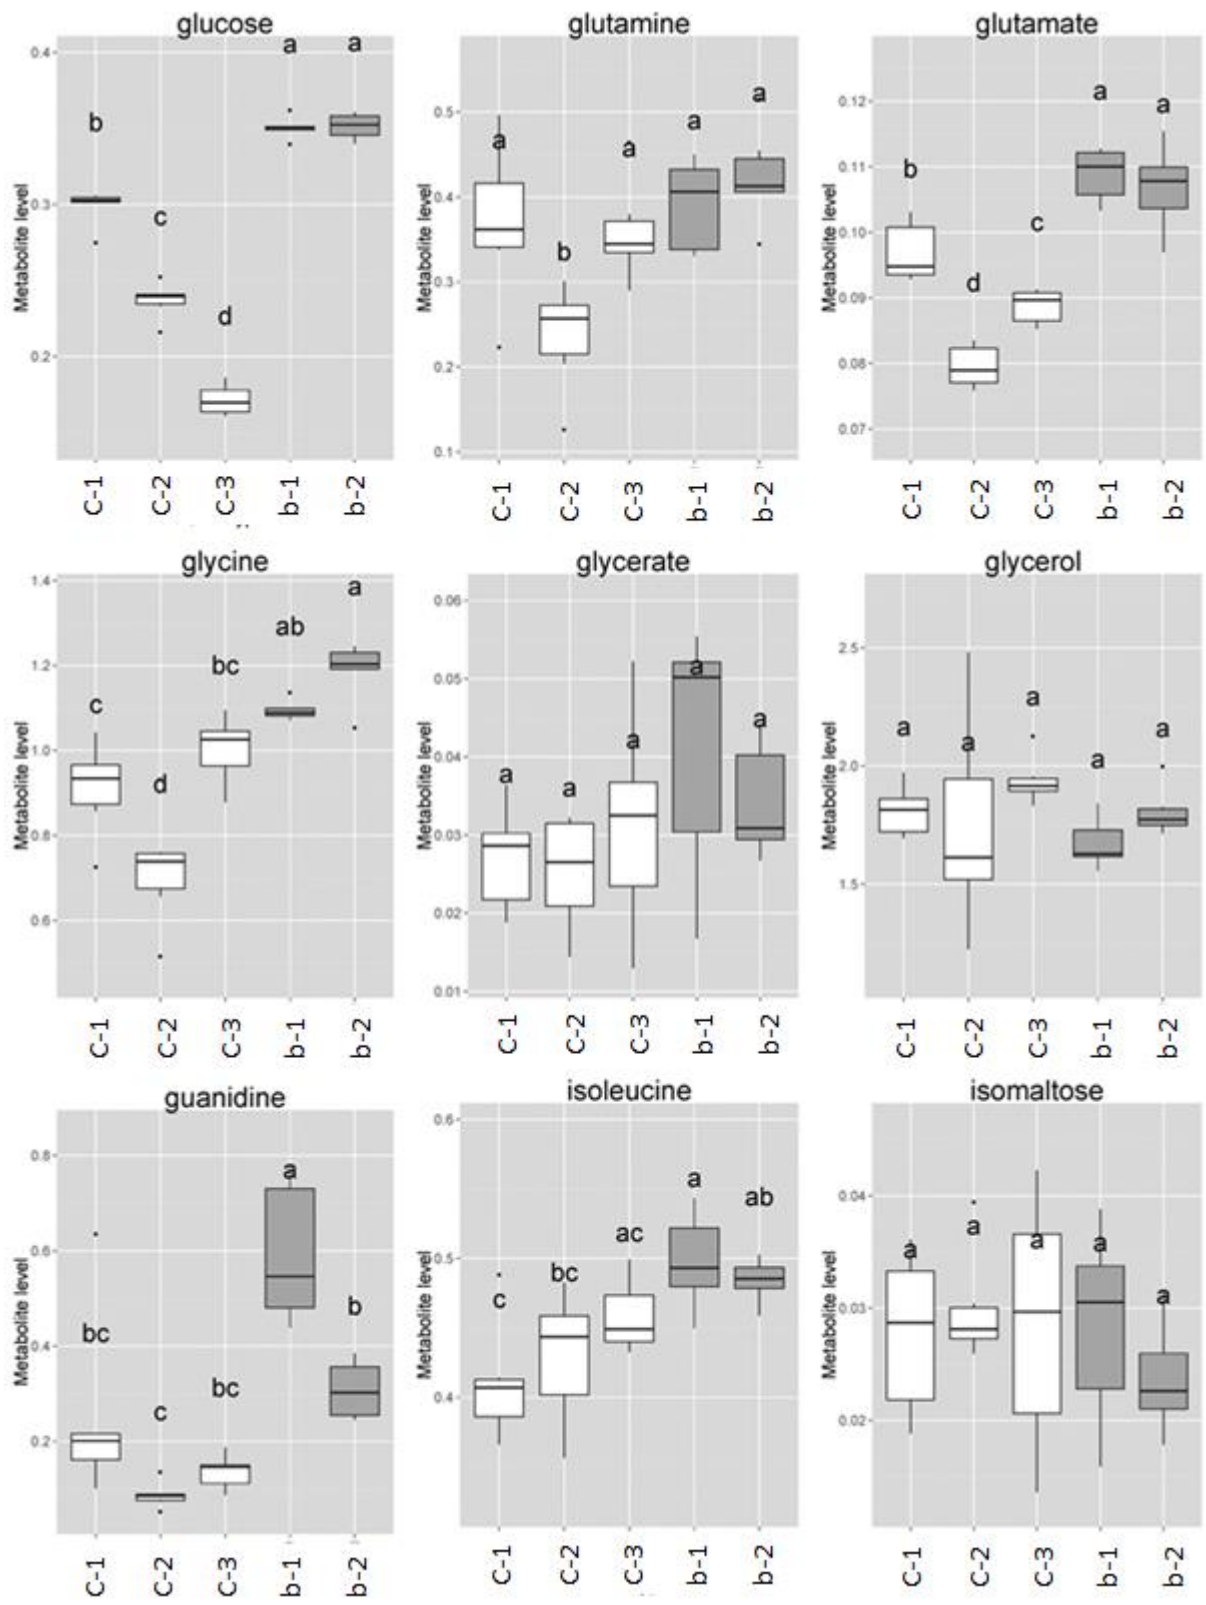

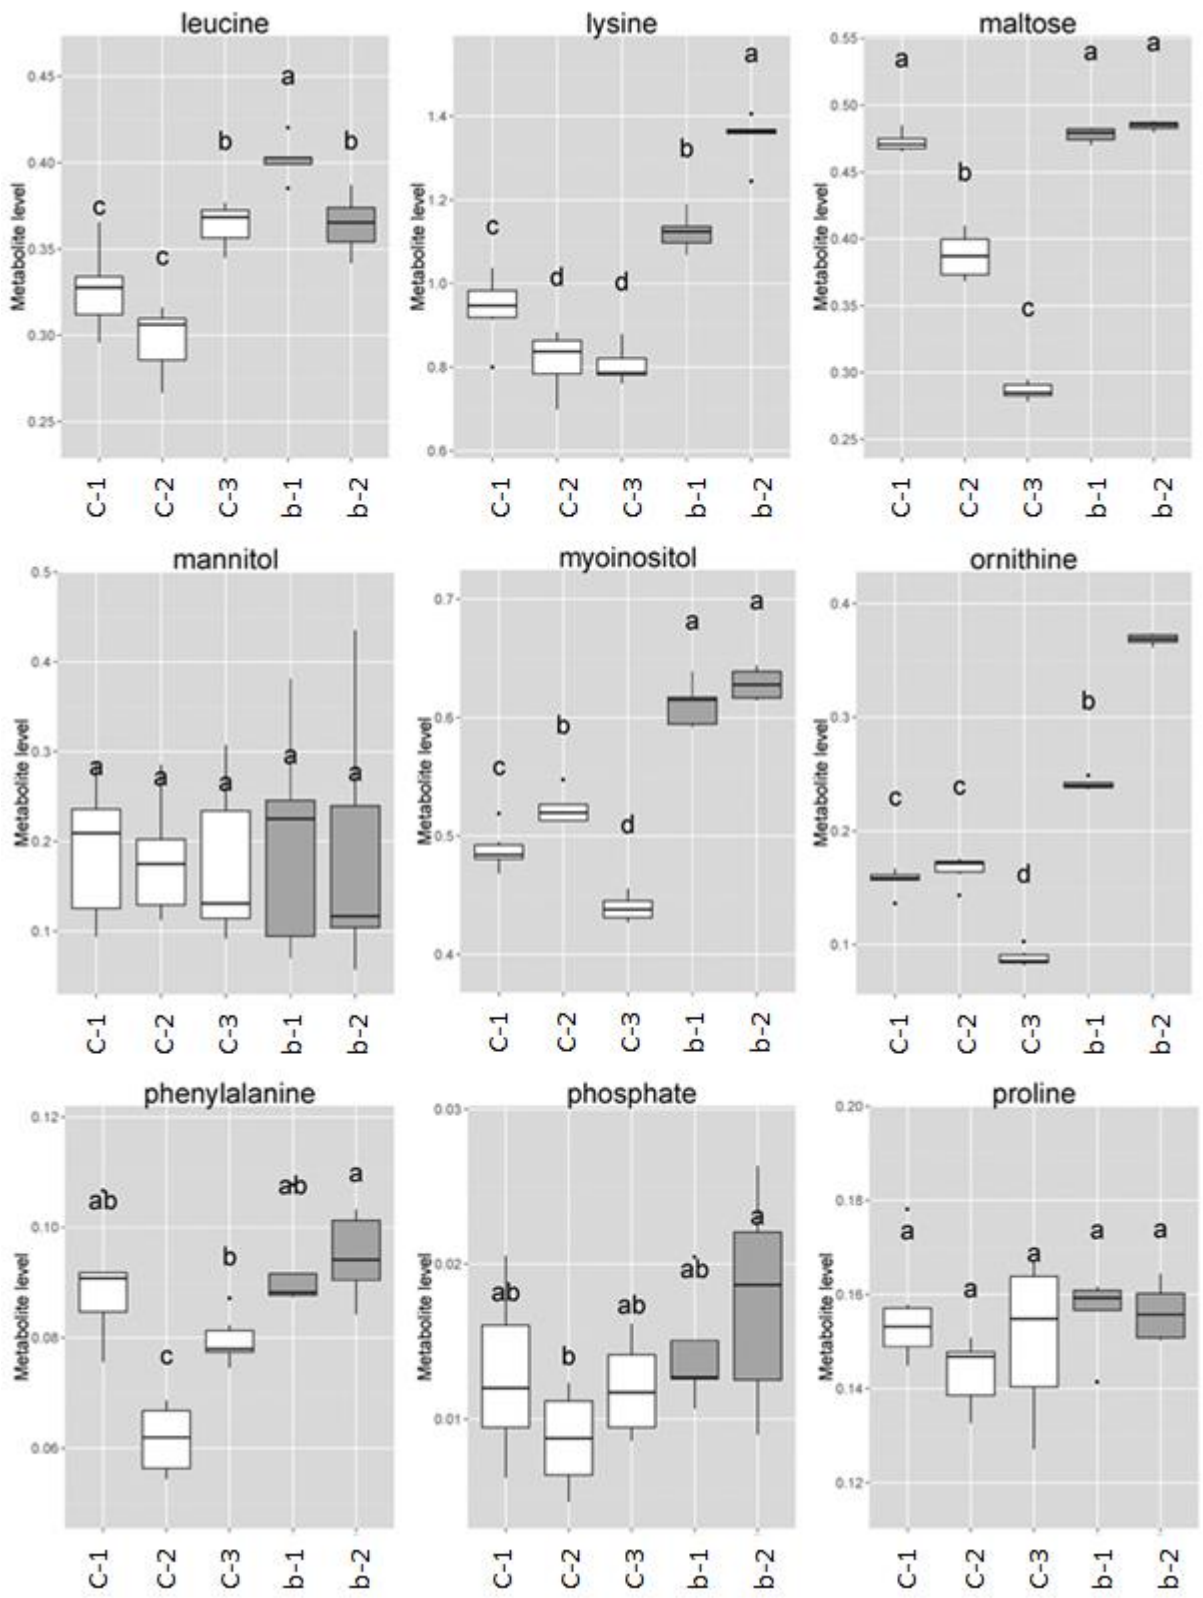

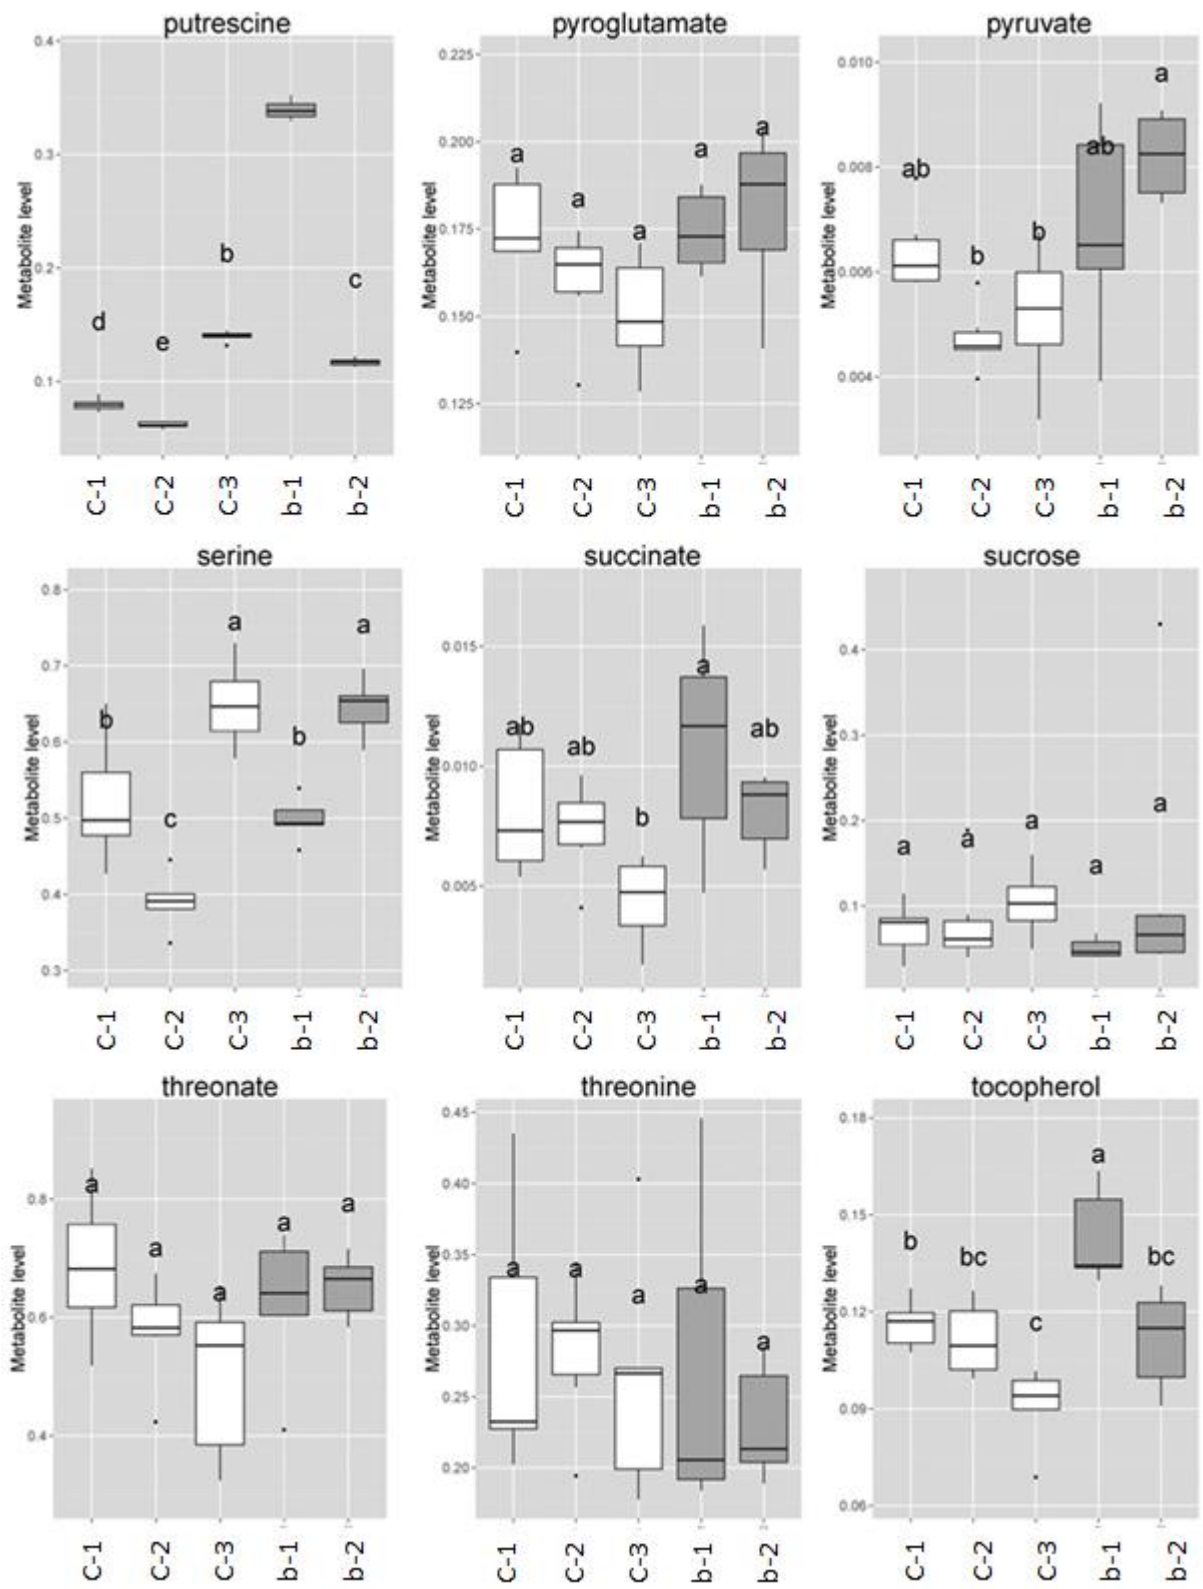

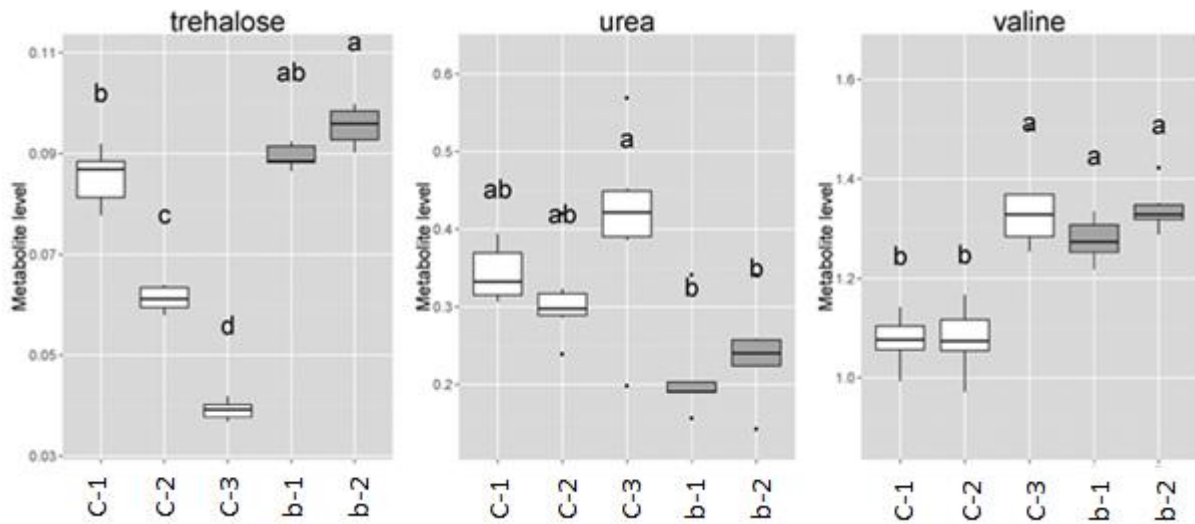

**Appendix Figure S9. Metabolite profiling of *bZIP14* overexpression lines.** White and grey box plots show relative metabolite levels in the three control lines (from left to right C-1 to C-3) and two *bZIP14* overexpressing lines (from left to right b-1 and b-2). Letters indicate the results of a Tukey's test comparing metabolite levels amongst genotypes (n=6).



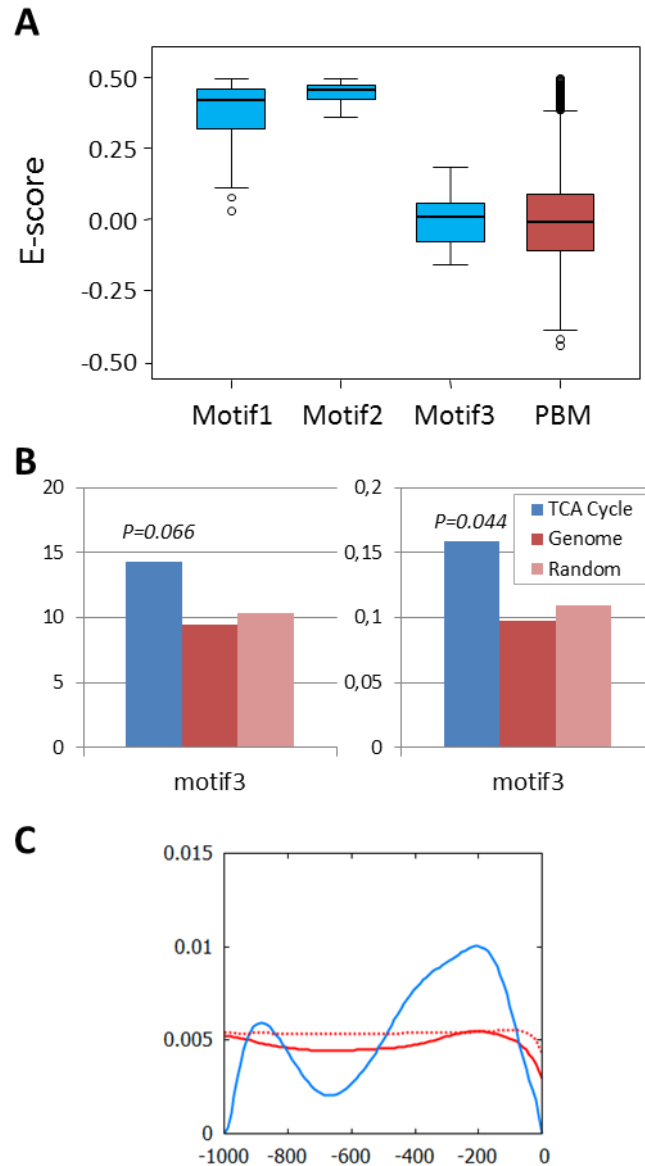

**Appendix Figure S10. bZIP14 does not bind the CACGTG motif.**

- A E-score distributions of motif 1 (sequence TGACGT), motif 2 (GTACGTA) and motif 3 (CACGTG) as determined in the protein binding array assay. The distribution of E-scores of all possible sequences represented in the protein binding microarray is shown in red.
- B Scan for motif 3 in all *P. tricornutum* gene promoters (genome in red; random promoters in light red) or only those linked with the TCA cycle (in blue). Left and right panels show the % promoters with motif 3 and the number of motifs per promoter, respectively, within 0.5 kb upstream of the ORF.
- C Histogramme showing the density of motif 3 in the proximal promoter regions of the 'TCA cycle genes' (in blue), in the whole genome (in red) or in random promoters (dashed red). The complete scan of 1.0 kb upstream of the ORF is shown.

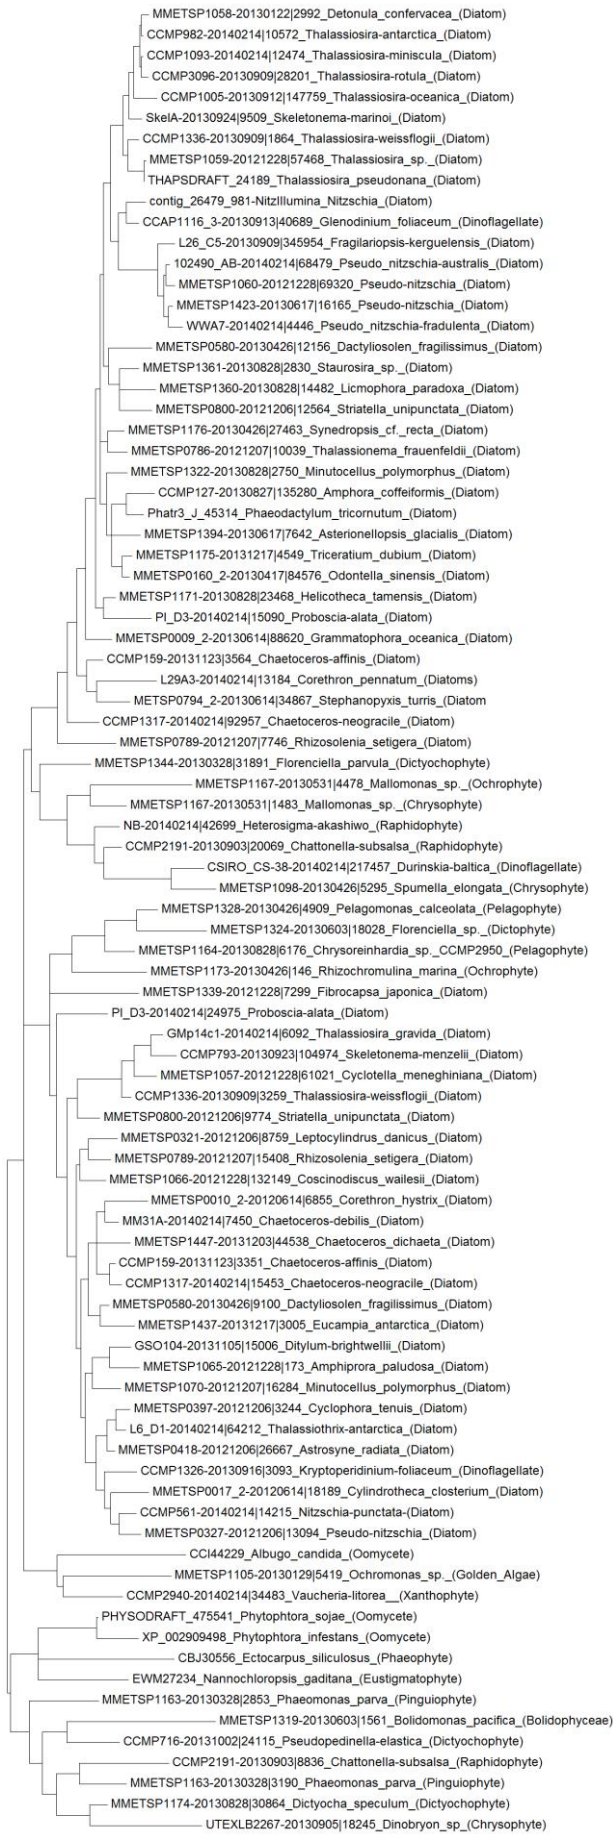

**Appendix Figure S11. Molecular phylogenetic analysis by the maximum likelihood method.** Sequences were retrieved by blasting the MMETSP database and the NCBI NR database. The retrieved sequences were selected to be representative and were aligned using the MUSCLE programme as implemented in MEGA7 using standard settings. The evolutionary history was inferred using the maximum likelihood method based on the JTT matrix-based model (Jones *et al*, 1992). The tree with the highest log likelihood (-7321.4631) is shown. Initial tree(s) for the heuristic search were obtained automatically by applying Neighbour-Join and BioNJ algorithms to a matrix of pairwise distances estimated using a JTT model, and then selecting the topology with superior log likelihood value. The tree is drawn to scale, with branch lengths measured in the number of substitutions per site. The analysis involved 88 amino acid sequences. All positions containing gaps and missing data were eliminated. There were a total of 51 positions in the final dataset. Evolutionary analyses were conducted in MEGA7.0.20 using standard settings (Kumar *et al*, 2016).

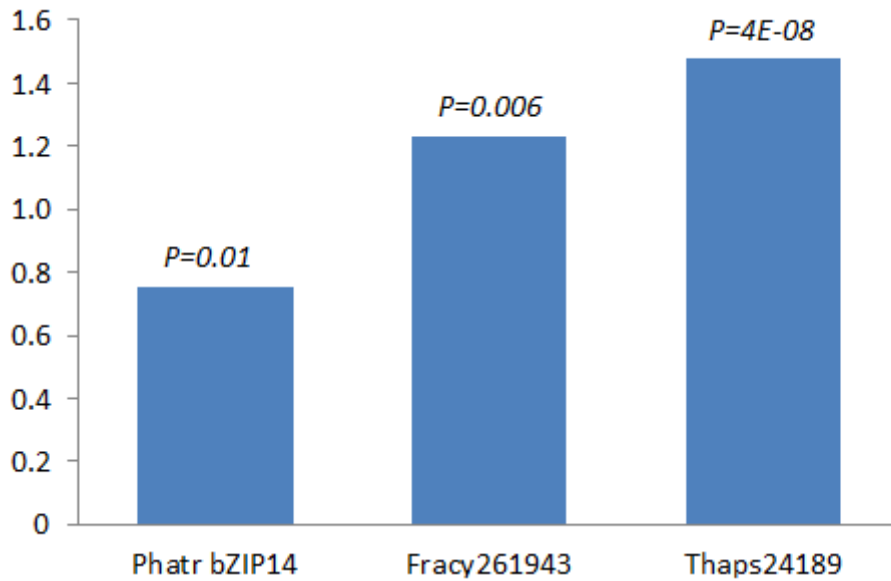

**Appendix Figure S12. Expression analysis of *bZIP14* genes in *P. tricornutum*, *T. pseudonana* and *F. cylindrus* following nutrient starvation.** For *P. tricornutum*, the data were derived from this study (nitrogen starvation after 20 h), for the two other species, expression data were collected from GEO GSE56132. Values in the y-axis indicate log<sub>2</sub> fold change in nitrogen-starved versus nutrient-replete conditions (n=3). *P*-values were obtained from Cuffdiff (for *P. tricornutum*) and EdgeR (for the two other species), respectively.

**Appendix Table S1. *P. tricornutum* gene promoters containing the predicted bZIP14 DNA-binding motifs.** Promoter regions of 1 kb upstream of the start codon were scanned for the occurrence of the two motifs with a core ACGT sequence, namely TGACGT (motif 1) and GTACGTA (motif 2).

| GENE          | ANNOTATION                                                                                                                                   | PROCESS                  | # MOTIF1 | # MOTIF2 |
|---------------|----------------------------------------------------------------------------------------------------------------------------------------------|--------------------------|----------|----------|
| PHATR3_J22404 | Pyruvate kinase {ECO:0000256 RuleBase:RU000504} [Source:Uniprot/SPTREMBL;Acc:B7G6Z9]                                                         | glycolytic process       | 6        | 0        |
| PHATR3_J14284 | Pyrophosphate-dependent phosphofructose kinase {ECO:0000313 EMBL:EEC46626.1} [Source:Uniprot/SPTREMBL;Acc:B7G4J8]                            | glycolytic process       | 1        | 2        |
| PHATR3_J14792 | Phosphoglycerate kinase {ECO:0000256 RuleBase:RU000532} [Source:Uniprot/SPTREMBL;Acc:B7G6H0]                                                 | glycolytic process       | 2        | 2        |
| PHATR3_J22122 | Glyceraldehyde-3-phosphate dehydrogenase {ECO:0000256 RuleBase:RU361160} [Source:Uniprot/SPTREMBL;Acc:B7G5Q1]                                | glycolytic process       | 3        | 1        |
| PHATR3_J29014 | Cytosolic class II aldolase {ECO:0000313 EMBL:EEC46498.1} [Source:Uniprot/SPTREMBL;Acc:B7G4R3]                                               | glycolytic process       | 3        | 1        |
| PHATR3_J22993 | Fructose-1,6-bisphosphate aldolase {ECO:0000313 EMBL:EEC44953.1} [Source:Uniprot/SPTREMBL;Acc:B7G9G9]                                        | glycolytic process       | 0        | 3        |
| PHATR3_J42398 | Malate dehydrogenase                                                                                                                         | malate metabolic process | 1        | 2        |
| PHATR3_J25308 | Triosephosphate isomerase/glyceraldehyde-3-phosphate dehydrogenase {ECO:0000313 EMBL:EEC50801.1} [Source:Uniprot/SPTREMBL;Acc:B7FSI3]        | glycolytic process       | 1        | 1        |
| PHATR3_J32747 | Glyceraldehyde-3-phosphate dehydrogenase {ECO:0000256 RuleBase:RU361160} [Source:Uniprot/SPTREMBL;Acc:B7FSI4]                                | glycolytic process       | 3        | 1        |
| PHATR3_J41423 | Fructose-bisphosphate aldolase {ECO:0000256 RuleBase:RU003994} [Source:Uniprot/SPTREMBL;Acc:B7GE67]                                          | glycolytic process       | 2        | 1        |
| PHATR3_J18228 | Triosephosphate isomerase {ECO:0000256 RuleBase:RU000517} [Source:Uniprot/SPTREMBL;Acc:B7FSQ0]                                               | glycolytic process       | 3        | 0        |
| PHATR3_J52539 | Succinate dehydrogenase [ubiquinone] iron-sulfur subunit, mitochondrial {ECO:0000256 RuleBase:RU361237} [Source:Uniprot/SPTREMBL;Acc:B7GA40] | tricarboxylic acid cycle | 2        | 1        |
| PHATR3_J11943 | Phosphoglycerate mutase {ECO:0000256 RuleBase:RU004513} [Source:Uniprot/SPTREMBL;Acc:B7FXR4]                                                 | glycolytic process       | 0        | 1        |
| PHATR3_J16722 | Glucose-6-phosphate isomerase {ECO:0000256 RuleBase:RU000612} [Source:Uniprot/SPTREMBL;Acc:B7GDLO]                                           | glycolytic process       | 0        | 1        |
| PHATR3_J48983 | Phosphoglycerate kinase {ECO:0000256 RuleBase:RU000532} [Source:Uniprot/SPTREMBL;Acc:B7G938]                                                 | glycolytic process       | 2        | 0        |
| PHATR3_J51970 | Malic enzyme {ECO:0000256 RuleBase:RU003426} [Source:Uniprot/SPTREMBL;Acc:B7FZD7]                                                            | malate metabolic process | 0        | 1        |

| GENE           | ANNOTATION                                                                                                                | PROCESS                  | # MOTIF1 | # MOTIF2 |
|----------------|---------------------------------------------------------------------------------------------------------------------------|--------------------------|----------|----------|
| PHATR3_J54082  | Malic enzyme                                                                                                              | malate metabolic process | 2        | 0        |
| PHATR3_J54738  | Triosephosphate isomerase {ECO:0000256 RuleBase:RU000517}<br>[Source:Uniprot/SPTREMBL;Acc:B7G3C1]                         | glycolytic process       | 2        | 0        |
| PHATR3_J55126  | PFP pyrophosphate dependent phosphofructokinase {ECO:0000313 EMBL:EEC43866.1}<br>[Source:Uniprot/SPTREMBL;Acc:B7GCG9]     | glycolytic process       | 0        | 2        |
| PHATR3_J27976  | Predicted protein {ECO:0000313 EMBL:EEC47679.1} [Source:Uniprot/SPTREMBL;Acc:B7G1G6]                                      | tricarboxylic acid cycle | 2        | 0        |
| PHATR3_J29157  | Phosphoglycerate kinase {ECO:0000256 RuleBase:RU000532}<br>[Source:Uniprot/SPTREMBL;Acc:B7G5G4]                           | glycolytic process       | 2        | 0        |
| PHATR3_J5629   | Phosphoglycerate mutase {ECO:0000256 RuleBase:RU004513}<br>[Source:Uniprot/SPTREMBL;Acc:B5Y4E3]                           | glycolytic process       | 1        | 1        |
| PHATR3_J5857   | glucose-6-phosphate isomerase                                                                                             | glycolytic process       | 1        | 1        |
| PHATR3_EG00092 | Pyrophosphate-dependent phosphofructose kinase {ECO:0000313 EMBL:EEC43176.1}<br>[Source:Uniprot/SPTREMBL;Acc:B7GE27]      | glycolytic process       | 0        | 1        |
| PHATR3_EG02208 | Glucose-6-phosphate isomerase {ECO:0000256 RuleBase:RU000612}<br>[Source:Uniprot/SPTREMBL;Acc:B7GDV0]                     | glycolytic process       | 2        | 0        |
| PHATR3_J41812  | Succinate dehydrogenase flavoprotein {ECO:0000313 EMBL:ACI65968.1}<br>[Source:Uniprot/SPTREMBL;Acc:B5Y5N6]                | tricarboxylic acid cycle | 1        | 0        |
| PHATR3_J42447  | Cytosolic aldolase {ECO:0000313 EMBL:EEC50983.1} [Source:Uniprot/SPTREMBL;Acc:B7FRC1]                                     | glycolytic process       | 1        | 0        |
| PHATR3_J49098  | Pyruvate kinase {ECO:0000256 RuleBase:RU000504} [Source:Uniprot/SPTREMBL;Acc:B7G9H4]                                      | glycolytic process       | 1        | 0        |
| PHATR3_J51404  | Phosphoglycerate mutase {ECO:0000256 RuleBase:RU004513}<br>[Source:Uniprot/SPTREMBL;Acc:B7FPT5]                           | glycolytic process       | 0        | 1        |
| PHATR3_J55035  | Pyruvate dehydrogenase E1 component subunit alpha {ECO:0000256 RuleBase:RU361139}<br>[Source:Uniprot/SPTREMBL;Acc:B7GAB0] | glycolytic process       | 2        | 0        |
| PHATR3_J5605   | PGAM_5                                                                                                                    | glycolytic process       | 1        | 0        |
| PHATR3_J8982   | PGAM_2                                                                                                                    | glycolytic process       | 1        | 0        |
| PHATR3_EG02261 | Putative phosphoenolpyruvate carboxylase {ECO:0000313 EMBL:BAK09353.1}<br>[Source:Uniprot/SPTREMBL;Acc:F1SXA1]            | tricarboxylic acid cycle | 1        | 0        |
| PHATR3_J22913  | Pyruvate kinase {ECO:0000256 RuleBase:RU000504} [Source:Uniprot/SPTREMBL;Acc:B7G961]                                      | glycolytic process       | 1        | 0        |
| PHATR3_J23924  | Glucose-6-phosphate isomerase {ECO:0000256 RuleBase:RU000612}<br>[Source:Uniprot/SPTREMBL;Acc:B7GDK9]                     | glycolytic process       | 0        | 1        |
| PHATR3_J26290  | aconitate hydratase 2                                                                                                     | tricarboxylic acid cycle | 0        | 1        |
| PHATR3_J54998  | Pyruvate kinase {ECO:0000256 RuleBase:RU000504} [Source:Uniprot/SPTREMBL;Acc:B7G9G7]                                      | glycolytic process       | 1        | 0        |

| GENE          | ANNOTATION                                                                           | PROCESS                  | # MOTIF1 | # MOTIF2 |
|---------------|--------------------------------------------------------------------------------------|--------------------------|----------|----------|
| PHATR3_J55079 | Pyruvate kinase {ECO:0000256 RuleBase:RU000504} [Source:Uniprot/SPTREMBL;Acc:B7GBB9] | glycolytic process       | 1        | 0        |
| PHATR3_J54834 | Malate dehydrogenase.                                                                | tricarboxylic acid cycle | 1        | 0        |
| PHATR3_J20934 | Malate dehydrogenase                                                                 | tricarboxylic acid cycle | 2        | 0        |
| PHATR3_J42015 | succinate-CoA ligase (SCSCa)                                                         | tricarboxylic acid cycle | 2        | 0        |
| PHATR3_J26921 | Suc SYN                                                                              | tricarboxylic acid cycle | 3        | 0        |
| PHATR2_45314  | bZIP14                                                                               | Transcription factor     | 1        | 0        |

**Appendix Table S2. Parameters used for peak annotation in the GC-MS analysis.** Indicated are: Peak no., compound number referenced back to the main text; RT, expected retention time; TTI, tag time index; TD, time deviation; Putative metabolite/derivative name, putative identification of the metabolite/derivative; Literature name, corresponding metabolite name in literature; MF, molecular formula of the metabolite or its FA adduct; m/z, mass to charge ratio. All identifications are level A, by standard or NMR.

| Peak no. | RT     | TTI    | TD    | Putative metabolite/derivative name                                         | Literature name | MF         | m/z |
|----------|--------|--------|-------|-----------------------------------------------------------------------------|-----------------|------------|-----|
| 1        | 531145 | 529987 | -0,27 | M000011_A164001-101_METB_531145_TOF_Phenylalanine, DL- (2TMS)               | phenylalanine   | C9H11NO2   | 218 |
| 2        | 790560 | 788911 | -0,15 | M000012_A223001-101_METB_790560_TOF_Tryptophan, L- (3TMS)                   | tryptophan      | C11H12N2O2 | 202 |
| 3        | 550100 | 549493 | -0,05 | M000013_A168001-101_METB_550100_TOF_Aspargine, DL- (3TMS)                   | asparagine      | C4H8N2O3   | 231 |
| 4        | 615467 | 615003 | 0,03  | M000014_A192003-101_METB_615467_TOF_Lysine, L- (4TMS)                       | lysine          | C6H14N2O2  | 174 |
| 5        | 357523 | 356928 | -0,15 | M000015_A138001-101_METB_357523_TOF_Serine, DL- (3TMS)                      | serine          | C3H7NO3    | 204 |
| 6        | 368365 | 369080 | 0,19  | M000016_A140001-101_METB_368365_TOF_Threonine, DL- (3TMS)                   | threonine       | C4H9NO3    | 117 |
| 7        | 319193 | 318893 | -0,08 | M000017_A132002-101_METB_319193_TOF_Isoleucine, L- (2TMS)                   | isoleucine      | C6H13NO2   | 158 |
| 8        | 305020 | 304918 | -0,03 | M000025_A129002-101_METB_301020_TOF_Leucine, DL- (2TMS)                     | leucine         | C6H13NO2   | 158 |
| 9        | 208565 | 208741 | -0,01 | M000026_A110001-101_METB_208565_TOF_Alanine, DL- (2TMS)                     | alanine         | C3H7NO2    | 116 |
| 10       | 394250 | 393887 | -0,08 | M000027_A144001-101_METB_394250_TOF_Alanine, beta- (3TMS)                   | beta-alanine    | C3H7NO2    | 174 |
| 11       | 570427 | 570440 | 0,02  | M000028_A182002-101_METB-METB_570427_TOF_Ornithine, DL- (4TMS)              | ornithine       | C5H12N2O2  | 420 |
| 12       | 338693 | 339666 | 0,32  | M000029_A132003-101_METB_338693_TOF_Proline, L- (2TMS)                      | proline         | C5H9NO2    | 117 |
| 13       | 271580 | 271479 | -0,03 | M000030_A122001-101_METB_271580_TOF_Valine, DL- (2TMS)                      | valine          | C5H11NO2   | 144 |
| 14       | 325180 | 324925 | -0,11 | M000031_A133001-101_METB_325180_TOF_Glycine (3TMS)                          | glycine         | C2H5NO2    | 174 |
| 15       | 598300 | 597549 | -0,08 | M000032_A178001-101_METB_598300_TOF_Glutamine, DL- (3TMS)                   | glutamine       | C5H10N2O3  | 156 |
| 16       | 457283 | 456619 | -0,01 | M000033_A152002-101_METB_457283_TOF_Aspartic acid, L- (3TMS)                | aspartate       | C4H7NO4    | 232 |
| 17       | 448453 | 447835 | -0,09 | M000034_A153001-101_METB_448453_TOF_Proline, 4-hydroxy-, DL-, trans- (3TMS) | 4hydroxyproline | C5H9NO3    | 140 |
| 18       | 658337 | 655216 | -0,46 | M000035_A194002-101_METB_658337_TOF_Tyrosine, DL- (3TMS)                    | tyrosine        | C9H11NO3   | 179 |
| 19       | 507780 | 507548 | -0,09 | M000036_A163001-101_METB_507780_TOF_Glutamic acid, DL- (3TMS)               | glutamate       | C5H9NO4    | 363 |
| 20       | 506483 | 505285 | 0,16  | M000037_A153002-101_METB-METB_506483_TOF_Pyroglutamic acid, DL- (2TMS)      | pyroglutamate   | C5H7NO3    | 258 |
| 21       | 605940 | 605094 | -0,14 | M000038_A183001-101_METB-METB_605940_TOF_Arginine, DL-, -NH3 (3TMS)         | arginine        | C6H11N3O2  | 157 |



| Peak no. | RT      | TTI     | TD    | Putative metabolite/derivative name                                       | Literature name  | MF        | m/z |
|----------|---------|---------|-------|---------------------------------------------------------------------------|------------------|-----------|-----|
| 22       | 598880  | 597918  | -0,18 | M000040_A191001-101_METB-METB_598880_TOF_Glucose, D- (1MEOX) (5TMS)       | glucose          | C6H12O6   | 160 |
| 23       | 840783  | 839645  | -0,14 | M000044_A264001-101_METB_840783_TOF_Sucrose, D- (8TMS)                    | sucrose          | C12H22O11 | 361 |
| 24       | 870355  | 869731  | -0,06 | M000048_A274001-101_METB_870355_TOF_Maltose, D- (1MEOX) (8TMS)            | maltose          | C12H22O11 | 160 |
| 25       | 291783  | 291885  | -0,02 | M000053_A129003-101_METB_291783_TOF_Glycerol (3TMS)                       | glycerol         | C3H8O3    | 117 |
| 26       | 499920  | 498883  | -0,07 | M000057_A171001-101_METB_499920_TOF_Xylitol (5TMS)                        | xylitol          | C5H12O5   | 205 |
| 27       | 653910  | 653731  | -0,03 | M000060_A209002-101_METB_653910_TOF_Inositol, myo (6TMS)                  | myoinositol      | C6H12O6   | 191 |
| 28       | 371255  | 371077  | -0,06 | M000067_A137001-101_METB_371255_TOF_Fumaric acid (2TMS)                   | fumarate         | C4H4O4    | 245 |
| 29       | 592883  | 591419  | -0,27 | M000069_A182004-101_METB-METB_592883_TOF_Citric acid (4TMS)               | citrate          | C6H8O7    | 273 |
| 30       | 222650  | 222521  | -0,08 | M000071_A104002-101_METB_222650_TOF_Pyruvic acid (1MEOX) (1TMS)           | pyruvate         | C3H4O3    | 174 |
| 31       | 345050  | 344114  | -0,27 | M000073_A135003-101_METB_345050_TOF_Glyceric acid, DL- (3TMS)             | glycerate        | C3H6O4    | 189 |
| 32       | 365427  | 364755  | 0,14  | M000074_A134001-101_METB_365427_TOF_Succinic acid (2TMS)                  | succinate        | C4H6O4    | 247 |
| 33       | 333520  | 333190  | -0,12 | M000075_A129001-101_METB_333520_TOF_Phosphoric acid (3TMS)                | phosphate        | H3O4P     | 299 |
| 34       | 458330  | 457574  | -0,24 | M000078_A156001-101_METB_458330_TOF_Threonic acid (4TMS)                  | threonate        | C4H8O5    | 292 |
| 35       | 624990  | 623620  | -0,22 | M000082_A185002-101_METB-METB_624990_TOF_Dehydroascorbic acid dimer (TMS) | dehydroascorbate | C6H6O6    | 173 |
| 36       | 190250  | 190658  | 0,27  | M000100_A105001-101_CONT-METB_190250_TOF_Lactic acid, DL- (2TMS)          | lactate          | C3H6O3    | 219 |
| 37       | 917000  | 915437  | -0,17 | M000107_A291002-101_METB_917000_TOF_Isomaltose (1MEOX) (8TMS)             | isomaltose       | C12H22O11 | 361 |
| 38       | 452200  | 451803  | -0,04 | M000114_A153003-101_METB_452200_TOF_Butyric acid, 4-amino- (3TMS)         | GABA             | C4H9NO2   | 304 |
| 39       | 517180  | 517114  | 0,02  | M000186_A175002-101_METB-METB_517180_TOF_Putrescine (4TMS)                | putrescine       | C4H12N2   | 174 |
| 40       | 1081300 | 1077515 | -0,34 | M000269_A355003-101_METB_1081300_TOF_Maltotriose 11TMS/1MeOx BP           | maltotriose      | C18H32O16 | 217 |
| 41       | 348220  | 347878  | -0,09 | M000347_A128003-101_CONT-METB_348220_TOF_Benzoic acid (1TMS)              | benzoate         | C7H6O2    | 105 |
| 42       | 340357  | 340516  | -0,17 | M000364_A127002-101_METB_340357_TOF_Urea (2TMS)                           | urea             | CH4N2O    | 171 |
| 43       | 266760  | 265927  | -0,34 | M000435_A116009-101_MST_266760_TOF_Guanidine (3TMS)                       | guanidine        |           | 146 |
| 44       | 206867  | 207359  | 0,34  | M000517_A106002-101_CONT-MST_206867_TOF_Glycolic acid (2TMS)              | glycolate        | C2H4O3    | 177 |
| 45       | 523847  | 522703  | -0,22 | M000571_A158004-101_METB_523847_TOF_Glutaric acid, 2-oxo- (1MEOX) (2TMS)  | 2OG              | C5H6O5    | 304 |
| 46       | 498150  | 497860  | -0,12 | M000579_A166001-101_METB_498150_TOF_Xylose, D- (1MEOX) (4TMS)             | xylose/lyxose    | C5H10O5   | 160 |
| 47       | 626890  | 629308  | 0,42  | M000596_A199002-101_METB_626890_TOF_Galactonic acid (6TMS)                | galactonate      | C6H12O7   | 157 |

| Peak no. | RT      | TTI     | TD    | Putative metabolite/derivative name                                           | Literature name  | MF        | m/z |
|----------|---------|---------|-------|-------------------------------------------------------------------------------|------------------|-----------|-----|
| 48       | 579380  | 578188  | -0,24 | M000606_A187002-101_METB_579380_TOF_Fructose, D- (1MEOX) (5TMS)               | fructose         | C6H12O6   | 217 |
| 49       | 1070600 | 1069783 | -0,08 | M000626_A316001-101_METB_1070600_TOF_Tocopherol, alpha- (1TMS)                | tocopherol       | C29H50O2  | 237 |
| 50       | 618870  | 619535  | 0,02  | M000639_A189003-101_METB_618870_TOF_Galactonic acid-1,4-lactone, D(-)- (4TMS) | galactonolactone | C6H10O6   | 217 |
| 51       | 876240  | 880218  | 0,49  | M000671_A274002-101_METB_876240_TOF_Trehalose, alpha,alpha'-, D- (8TMS)       | trehalose        | C12H22O11 | 169 |
| 52       | 583850  | 581142  | -0,37 | M000687_A193002-101_METB_583850_TOF_Mannitol, D- (6TMS)                       | mannitol         | C6H14O6   | 217 |
| 53       | 716750  | 716569  | -0,02 | M000709_A225006-101_METB_716750_TOF_Glucoheptonic acid (7TMS)                 | glucoheptonate   |           | 217 |

**Appendix Table S3. Primers used for cloning and qRT-PCR analysis.**

| Primer           | Sequence                                                         |
|------------------|------------------------------------------------------------------|
| For cloning      |                                                                  |
| FW_bZIP14_45314  | 5'-GGGGACAAGTTTGTACAAAAAAGCAGGCTCCATGCGATTTCCAGCCGCTTCAGTGG-3'   |
| RV_bZIP14_45314  | 5'-GGGGACCACTTTGTACAAGAAAGCTGGGTCTCMCCAACCCACAGGGGCTGCAAGA-3'    |
| FW_pJ41812_Y1H   | 5'-GGGGACAACCTTTGTATAGAAAAGTTGAACATTCTAAATCTCAAACGCCGATTAC-3'    |
| RV_pJ41812_Y1H   | 5'-GGGGACTGCTTTTTTGTACAAACTGGCTTACAATCACGGATTTTCGTAGTTGGTTTAC-3' |
| FW_pJ52539_Y1H   | 5'-GGGGACAACCTTTGTATAGAAAAGTTGAAGAGAGAGTGTGGGATGAAGAACG-3'       |
| RV_pJ52539_Y1H   | 5'-GGGGACTGCTTTTTTGTACAAACTGGCAAGTGATTCCAGTTTGCCACGTC-3'         |
| For qRT-PCR      |                                                                  |
| FW_Q_Bzip14      | 5'-AGAAATGGCCGAAATGTGTC-3'                                       |
| RV_Q_Bzip14      | 5'-GAAGTTGGCTCGGACTCAAG-3'                                       |
| FW_26290_Q_AH    | 5'-ACTGAAAGAACCCGTGTTGG-3'                                       |
| RV_26290_Q_AH    | 5'-CGTCCATCTTGGTAGGAGGA-3'                                       |
| FW_20934_Q_ICD   | 5'-TGGATTTCGACATGAACCTGA-3'                                      |
| RV_20934_Q_ICD   | 5'-TCTTTGCGCATTTC AACAG-3'                                       |
| FW_29016_Q_OGD   | 5'-CACATTTGGAATGCGTCAAC-3'                                       |
| RV_29016_Q_OGD   | 5'-GTTGGTGGTGAAGCCAATCT-3'                                       |
| FW_42015_Q_SCSa  | 5'-ATTAAACCCGGTGAATGCAA-3'                                       |
| RV_42015_Q_SCSa  | 5'-GGTGAAACGTTCCAAGCAAT-3'                                       |
| FW_26921_Q_SCSa2 | 5'-AAGCCATCCTCGTCAACATC-3'                                       |
| RV_26921_Q_SCSa2 | 5'-GCATCTCCAGATCCTCTGC-3'                                        |
| FW_52539_Q_SDH2  | 5'-CGCTCGCCTGTCTATCCTAC-3'                                       |
| RV_52539_Q_SDH2  | 5'-ATACATTCCGTCGAGCTTGG-3'                                       |
| FW_18516_Q_SDHcb | 5'-CGCTGTGCGCCAGTATTACAA-3'                                      |
| RV_18516_Q_SDHcb | 5'-TCAAACCTCCCCATAATGA-3'                                        |
| FW_41812_Q_SDH1  | 5'-CCAACCAGGACAACGAGTTT-3'                                       |
| RV_41812_Q_SDH1  | 5'-TGAAACGACGTCTCTCGATG-3'                                       |
| FW_36139_Q_FUM   | 5'-ACGAGCGAACTCTACCAGGA-3'                                       |
| RV_36139_Q_FUM   | 5'-CCCAAGGCTAAACGGTACAA-3'                                       |
| FW_19708_Q_FUM1  | 5'-GGTTACCGGACTACGCAAAA-3'                                       |
| RV_19708_Q_FUM1  | 5'-CTTTTTGCAAGCATTTCGTCA-3'                                      |
| FW_Q_Urease      | 5'-GACAGGATTCGGTTGCTGAT-3'                                       |
| RV_Q_Urease      | 5'-GCCGAGACAGGGTTGTGTAT-3'                                       |
| FW_Q_CS_30145    | 5'-TCCTGAAATGGATCCAGGAG-3'                                       |
| RV_Q_CS_30145    | 5'-AAAATGTCGGGCATGACTTC-3'                                       |
| FW_Q_MD_42398    | 5'-GGTAGCTGCGGATCTCAGTC-3'                                       |
| RV_Q_MD_42398    | 5'-CAGCGTTGGTGTGAAGAGA-3'                                        |
| Q_M_FW_RP3A      | 5'-AAAGAGCATGCCAAGTGGTG-3'                                       |
| Q_M_RV_RP3A      | 5'-TCTACAGCTCGAATGTCCCC-3'                                       |
| Q_M_FW_PUA       | 5'-TGGATTGACAAACCCTGGC-3'                                        |
| Q_M_RV_PUA       | 5'-TCCCCCTCACTTCCAAACTG-3'                                       |
| Q_L_FW_VTC4      | 5'-GGCACATTTGCGCTACGATT-3'                                       |
| Q_L_RV_VTC4      | 5'-TATCCTCGTGTACGTGTCG-3'                                        |

## Appendix References

- Alipanah L, Rohloff J, Winge P, Bones AM, Brembu T (2015) Whole-cell response to nitrogen deprivation in the diatom *Phaeodactylum tricornutum*. *J Exp Bot* **66**: 6281-6296
- Chauton MS, Winge P, Brembu T, Vadstein O, Bones AM (2013) Gene regulation of carbon fixation, storage and utilization in the diatom *Phaeodactylum tricornutum* acclimated to light/dark cycles. *Plant Physiol* **161**: 1034-1048
- Daboussi F, Leduc S, Maréchal A, Dubois G, Guyot V, Perez-Michaut C, Amato A, Falciatore A, Juillerat A, Beurdeley M, Voytas DF, Cavarec L, Duchateau P (2014) Genome engineering empowers the diatom *Phaeodactylum tricornutum* for biotechnology. *Nat Commun* **5**: 3831
- Falkowski PG, Katz ME, Knoll AH, Quigg A, Raven JA, Schofield O, Taylor FJR (2004) The evolution of modern eukaryotic phytoplankton. *Science* **305**: 354-360
- Huysman MJJ, Fortunato AE, Matthijs M, Schellenberger Costa B, Vanderhaeghen R, Van den Daele H, Sachse M, Inzé D, Bowler C, Kroth PG, Wilhelm C, Falciatore A, Vyverman W, De Veylder L (2013) AUREOCHROME1a-mediated induction of the diatom-specific cyclin *dsCYC2* controls the onset of cell division in diatoms (*Phaeodactylum tricornutum*). *Plant Cell* **25**: 215-228
- Jones DT, Taylor WR, Thornton JM (1992) The rapid generation of mutation data matrices from protein sequences. *Comput Biol Med* **8**: 275-282
- Kumar S, Stecher G, Tamura K (2016) MEGA7: Molecular Evolutionary Genetics Analysis version 7.0 for bigger datasets. *Mol Biol Evol* **33**: 1870-1874
- Levitan O, Dinamarca J, Zelzion E, Lun DS, Guerra LT, Kim MK, Kim J, Van Mooy BAS, Bhattacharya D, Falkowski PG (2015) Remodeling of intermediate metabolism in the diatom *Phaeodactylum tricornutum* under nitrogen stress. *Proc Natl Acad Sci USA* **112**: 412-417
- Matthijs M, Fabris M, Broos S, Vyverman W, Goossens A (2016) Profiling of the early nitrogen stress response in the diatom *Phaeodactylum tricornutum* reveals a novel family of RING-domain transcription factors. *Plant Physiol* **170**: 489-498
- Valenzuela J, Mazurie A, Carlson RP, Gerlach R, Cooksey KE, Peyton BM, Fields MW (2012) Potential role of multiple carbon fixation pathways during lipid accumulation in *Phaeodactylum tricornutum*. *Biotechnol Biofuels* **5**: 40
- Yang Z-K, Niu Y-F, Ma Y-H, Xue J, Zhang M-H, Yang W-D, Liu J-S, Lu S-H, Guan Y, Li H-Y (2013) Molecular and cellular mechanisms of neutral lipid accumulation in diatom following nitrogen deprivation. *Biotechnol Biofuels* **6**: 67
